# Supplementary material for: A supported pyridylimine–cobalt catalyst for N-formylation of amines using CO2
Source: Royal Society of Chemistry journal article supplement (doi:10.1039/d3dt00058c), 2023-01-01
Supplement: d3dt00058c1.pdf [file d3dt00058c1.pdf]

## Supporting Information

### Supported Pyridylimine-Cobalt Catalyst for N-Formylation of Amines Utilizing CO<sub>2</sub>

Naved Akhtar, Manav Chauhan, Poorvi Gupta, Neha Antil, Kuntal Manna\*

Department of Chemistry, Indian Institute of Technology Delhi, Hauz Khas, New Delhi 110016, India

\*Email: kmanna@chemistry.iitd.ac.in

### Table of contents

|                                                                      |            |
|----------------------------------------------------------------------|------------|
| <b>1. General experiment</b>                                         | <b>S2</b>  |
| <b>2. Synthesis and characterization of pyrim-UiO-68 MOF</b>         | <b>S3</b>  |
| <b>3. Post synthetic metalation of pyrim-UiO-68 MOF</b>              | <b>S5</b>  |
| <b>4. Pyrim-MOF-Co(THF) catalysed <i>N</i>-formylation of amines</b> | <b>S7</b>  |
| <b>5. Kinetics study for <i>N</i>-formylation of amines</b>          | <b>S13</b> |
| <b>6. GC-MS analysis of the products</b>                             | <b>S13</b> |
| <b>7. X-ray absorption spectroscopic analysis</b>                    | <b>S16</b> |
| <b>8. DFT calculations</b>                                           | <b>S22</b> |
| <b>9. XPS analysis</b>                                               | <b>S27</b> |
| <b>10. References</b>                                                | <b>S30</b> |

**1. General experiment.** All the experiments were performed under inert conditions inside the glovebox, except if any case was demonstrated. All the solvents were purchased from Finar and used without further purification. Tetrahydrofuran was dried with calcium hydride followed by distillation over Na/benzophenone. All the reagents are commercially available and used directly as received. 2,5-dibromoaniline was purchased from Alfa Aesar, and  $\text{ZrCl}_4$  was purchased from Sigma Aldrich.  $^1\text{H}$  NMR spectra were recorded on a Bruker NMR 500 DRX spectrometer at 500 MHz and referenced to the proton resonance resulting from  $\text{DMSO-}d_6$  ( $\delta$  2.5). Thermogravimetric analysis (TGA) was performed on a PerkinElmer TGA7 system on well-ground samples in a flowing nitrogen atmosphere with a heating rate of  $10\text{ }^\circ\text{C}/\text{min}$  with a range of  $40\text{--}800\text{ }^\circ\text{C}$ . Room temperature powder X-ray diffraction data were collected on a Bruker Advance diffractometer using Ni-filtered  $\text{Cu K}\alpha$  radiation ( $\lambda = 1.5406\text{ \AA}$ ). Data were collected with a step size of  $0.05^\circ$  and at count time of 1s per step over the range  $4^\circ < 2\theta < 70^\circ$ . The experimental and simulated PXRD patterns are in good agreement indicating the monophasic nature of the bulk samples. For powder X-ray diffraction measurement of MOFs, moist sample was mounted on a PXRD groove. After catalysis, pyrim-UiO-Co was recovered after centrifugation and stored in THF. Just before the PXRD measurement, the THF was removed, and the moist sample was mounted on a PXRD groove. The catalysis was carried out without any mechanical stirring, and the recovered MOF was not dried before the measurement of PXRD to prevent any mechanical degradation and pore collapse of the MOF. In the case of product analysis of the liquid phase using GC-MS, the following chromatographic conditions were employed; carrier gas: He, flow rate:  $1\text{ mL min}^{-1}$ , injection volume:  $5.0\text{ }\mu\text{L}$ , column oven temperature was initially  $80.0\text{ }^\circ\text{C}$  and then increased up to  $230\text{ }^\circ\text{C}$  with the rate of  $5\text{ }^\circ\text{C}$  per minute, and detector temperature was  $250\text{ }^\circ\text{C}$ . The hydrogen gas evolution was analyzed by a Centurion GC (CS5800) equipped with Porapak Q column in sequence with molecular sieves column and a Thermal conductivity detector (TCD). The chromatographic conditions are as follows; Carrier gas: Argon, Column:  $80\text{ }^\circ\text{C}$ , TCD:  $200\text{ }^\circ\text{C}$ , and Injection temperature:  $100\text{ }^\circ\text{C}$ . ICP-OES data were obtained with an Agilent 5110 ICP-OES and analyzed using Dichroic Spectral Combiner (DSC). Samples were diluted in a  $5\%$   $\text{HNO}_3$  matrix and analyzed with a six-point standard curve over the range from  $0.1\text{ ppm}$  to  $20\text{ ppm}$ . The correlation coefficient was  $>0.9990$  for all analytes of interest. All the reduction reactions were performed using  $100\text{ mL}$  Parr pressure vessels (4793 (VGR)-T-SS-3000-DVD). The vessel was pressurized directly from a  $\text{CO}_2$  gas tank using a gauge ( $0\text{--}3000\text{ psi}$  displayed,  $0\text{--}200\text{ bar}$ ). To analyse the chemical state of transition elements XPS were recorded on an X-ray photoelectron spectrometer, PHI 5000 VersaProbe III using  $\text{Al-K}\alpha$  ( $h\nu = 1486.6\text{ eV}$ ) X-ray source. MOF samples were vacuum

dried at room temperature, and then powder samples were measured ultra-high vacuum environment. The morphology and chemical compositions were analysed with a Zeiss Fe-SEM ultra plus55 operating at 20 KV. After vacuum drying, a very small amount of the powder samples of MOF (1-2 mg) were dispersed on the carbon tape for FE-SEM imaging.

## 2. Synthesis and characterization of pyridylimine-functionalized UiO-68 MOFs.

**2.1. Synthesis of UiO-68-NH<sub>2</sub> MOF.**<sup>1</sup> First, H<sub>2</sub>TPDC-NH<sub>2</sub> (2'-amino-[1,1':4',1''-terphenyl]-4,4''-dicarboxylic acid) was synthesized following a modified procedure.<sup>2, 3</sup> H<sub>2</sub>TPDC-NH<sub>2</sub> (0.010 g, 0.03 mmol) and benzoic acid (0.073 g, 0.6 mmol) were dissolved in a DMF solution (1.22 ml) followed by the addition of ZrCl<sub>4</sub> (0.007 g, 0.03 mmol). The resulting mixture was sonicated for a few minutes and then kept it in a preheated oven at 70 °C for 3 d. After cooling to room temperature, the crystalline solid was isolated by centrifugation and washed it with DMF several times to afford UiO-68-NH<sub>2</sub> MOFs in 41% yield.

### 2.2. Post synthetic modification of synthesized UiO-68-NH<sub>2</sub> MOF.<sup>4</sup>

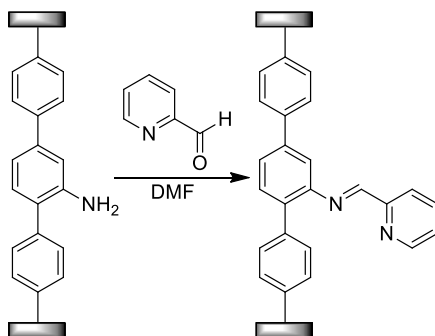

In a 1.5 ml centrifuge tube inside the glovebox, synthesized UiO-68-NH<sub>2</sub> MOF was taken in 1ml of deoxygenate DMF followed by the addition of 2-pyridinecarboxaldehyde (20  $\mu$ l, 0.210 mmol). The resulting mixture was left overnight with periodic shaking followed by multiple washing of MOF with DMF resulted in pyrim-UiO MOF as light brown solid.

**2.3. Analysis of digested pyrim-UiO MOF by  $^1\text{H}$  NMR.** Digestion of pyrim-UiO MOF was carried out by charging the synthesized UiO MOF into vial containing 0.5 mL of  $\text{DMSO-}d_6$ , followed by the addition of saturated solution of  $\text{K}_3\text{PO}_4$  in  $\text{D}_2\text{O}$  with periodic shaking of the resulting mixture. The top organic layer of  $\text{DMSO-}d_6$  was then separated out and analysed by  $^1\text{H}$  NMR. The  $^1\text{H}$  NMR spectrum of digested pyrim-UiO MOF in Figure S1 showed the presence of about 95% pyridylimine moiety along with and 5% TPDC- $\text{NH}_2^{2-}$  and 2-pyridinecarboxaldehyde. We thus conclude that the condensation reaction between amine-tagged UiO-68 MOF ( $\text{UiO-68-NH}_2$ ) with 2-pyridinecarboxaldehyde in DMF at room temperature gave the corresponding pyridylimine-functionalized UiO-68 MOF (pyrim-UiO) in 100% conversion, in which all the amino groups were converted to the corresponding pyridylimine. 5% Pyridylimine were hydrolyzed during the digestion process in  $\text{D}_2\text{O}$  as revealed by the presence of TPDC- $\text{NH}_2^{2-}$  and 2-pyridinecarboxaldehyde in 1:1 ratio in the  $^1\text{H}$  NMR spectrum.

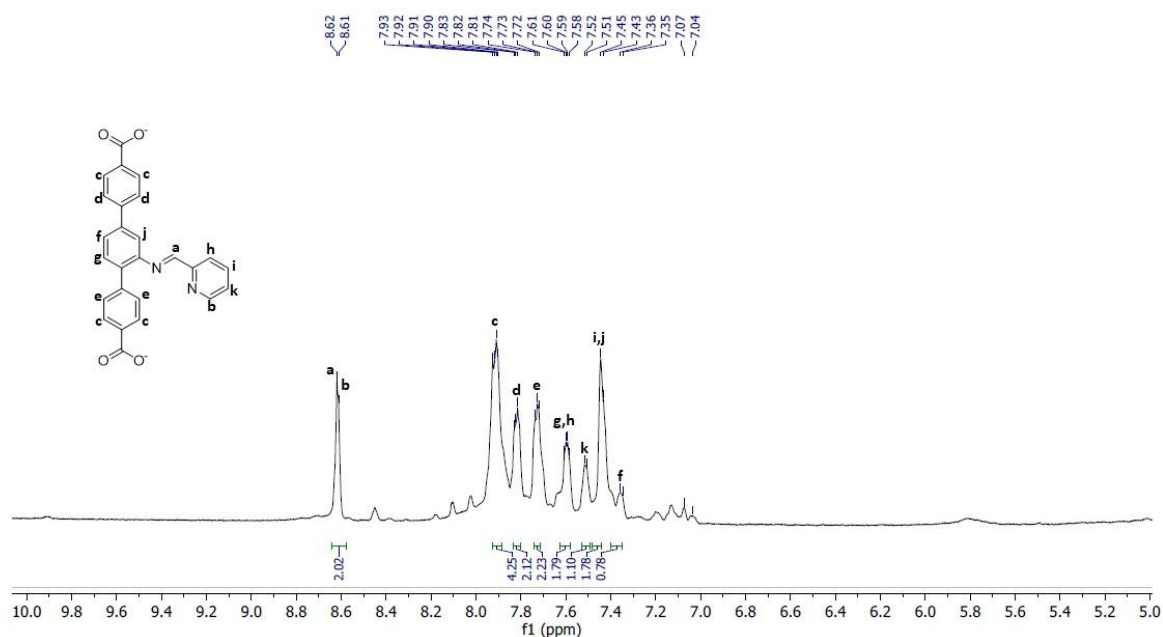

**Figure S1.**  $^1\text{H}$  NMR spectrum (500 MHz,  $\text{DMSO-}d_6$ ) of pyrim-UiO MOF digested in  $\text{K}_3\text{PO}_4/\text{D}_2\text{O}/\text{DMSO-}d_6$ .

### 3. Post synthetic metalation of pyrim-MOFs.<sup>5</sup>

#### 3.1. Synthesis of pyrim-UiO-CoCl<sub>2</sub>.

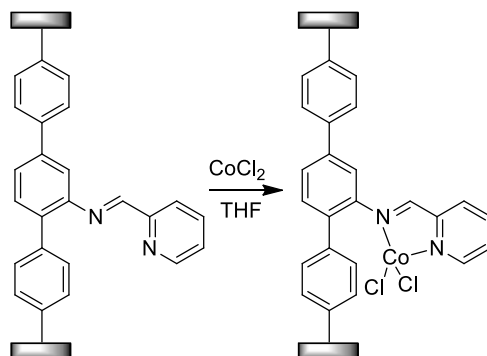

Pyrim-UiO MOF (0.030 g, 0.009 mmol) in THF was charged into a vial, and then 1 mL THF solution of CoCl<sub>2</sub> (0.007 g, 0.054 mmol) was added to it. The mixture was stirred slowly overnight at rt. The resultant blue-green solid was centrifuged out of suspension and washed with THF 4-5 times. Pyrim-UiO-Co has 28% solvent weight based on TGA analysis and 38% Co-loading based on ICP-MS analysis.

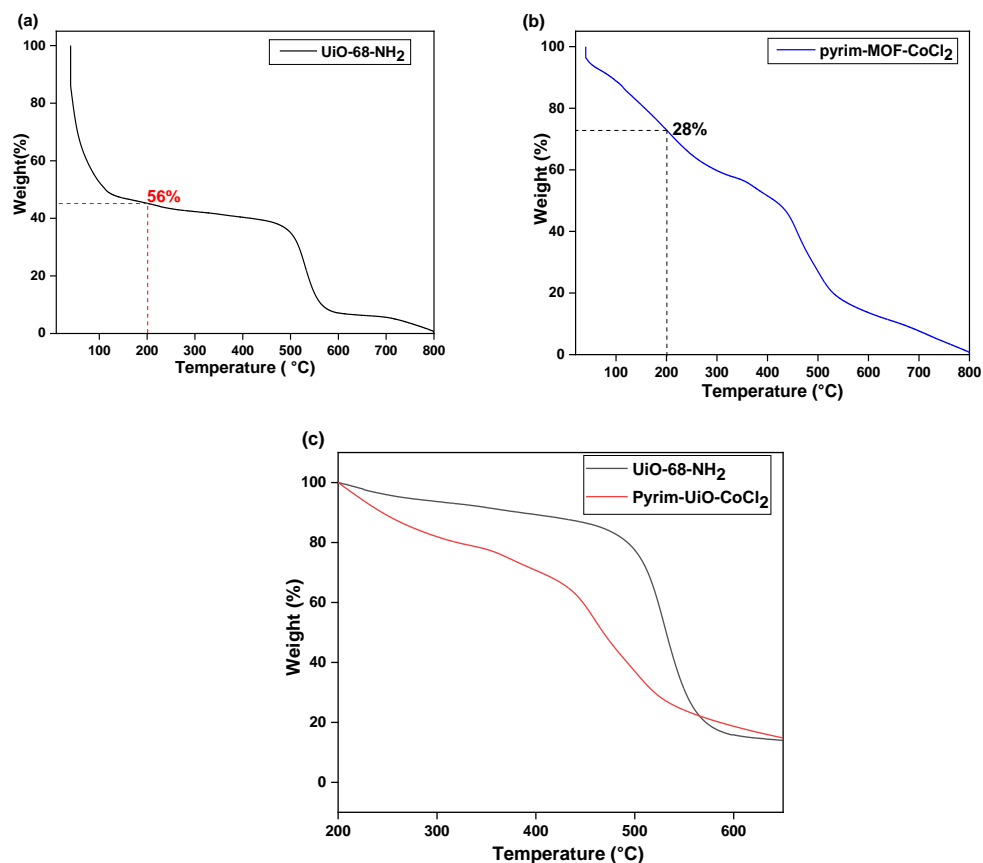

**Figure S2.** TGA curve of freshly prepared (a) UiO-68-NH<sub>2</sub> and (b) pyrim-UiO-CoCl<sub>2</sub>. A solvent weight loss of 56% was observed in (a) and 28% in (b) the room temperature from 40 °C to 200 °C range. (c) TGA curve of freshly prepared UiO-68-NH<sub>2</sub> (black) and pyrim-UiO-CoCl<sub>2</sub> (red) from 200-650 °C. The increased weight of metalated MOF is due to the presence of cobalt within the MOF.

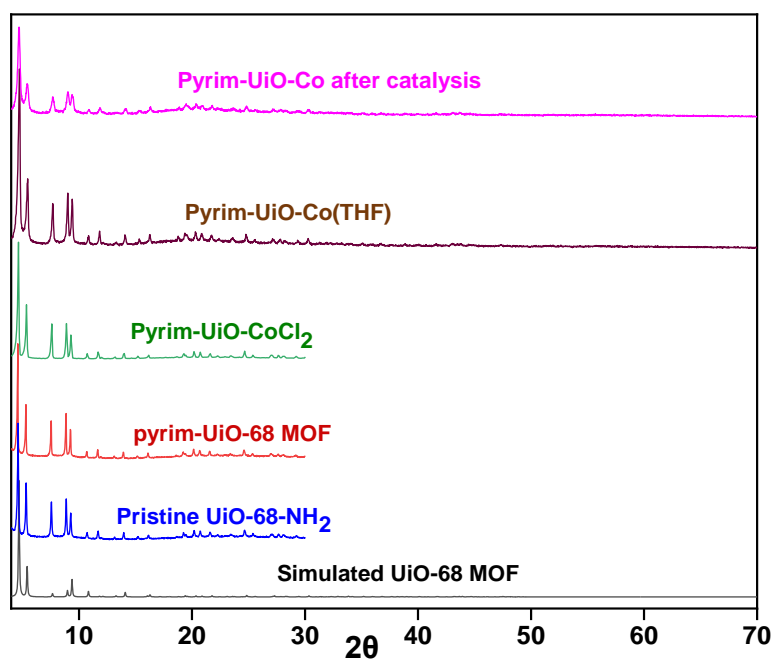

**Figure S3.** PXRD patterns of simulated UiO-68 MOF (black) and as-synthesized UiO-68-NH<sub>2</sub> MOF (blue), pyrim-UiO-68 MOF (red) and pyrim-UiO-CoCl<sub>2</sub> (green), pyrim-UiO-Co(THF) (brown) and pyrim-UiO-Co after catalysis (magenta).

### 3.2 Synthesis of pyrim-UiO-Co(THF).<sup>5</sup>

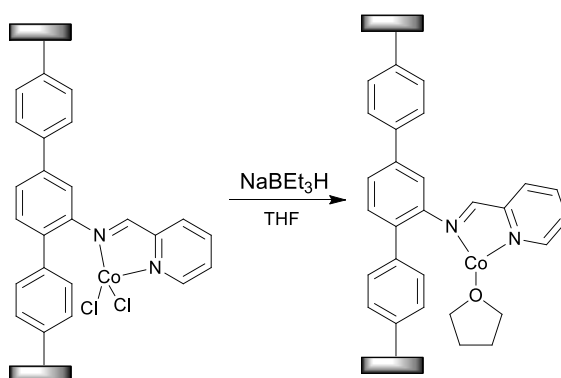

Pyrim-UiO-CoCl<sub>2</sub> (0.015 g, 0.00378 mmol) was charged into a vial containing 3 ml of THF. NaEt<sub>3</sub>BH (15  $\mu$ L, 1 M in toluene) was added dropwise to the vial, and the mixture was stirred gently for 1 h at room temperature to give pyrim-UiO-Co as black colored solid. The resultant MOF catalyst was separated via centrifugation and then washed with THF several times. Pyrim-MOF-Co(THF) was then used directly for the catalysis.

#### 4. Catalytic reactions with pyrim-UiO-Co(THF).

**4.1. General procedure for pyrim-UiO-Co(THF) catalysed N-formylation of amines using phenyl silane.** In the glovebox, pyrim-UiO-Co(THF) (0.5mol % of Co) in 3ml THF was transferred into 50 ml glass liner. Then phenyl silane along with amine containing substrate were added in to the liner. Then, the liner was fitted in a high pressure reactor followed air tight sealed. The sealed Parr reactor was taken out from the glovebox and purged with CO<sub>2</sub> for 2 to 3 times. The Parr reactor was pressurized to 1-20 bar CO<sub>2</sub> and kept on heating at 80 °C for 16 to 36 h. After the reaction was completed the solid MOF was removed with the help of centrifugation from the suspension inside the glovebox followed by several washing with THF and can be reused. The remaining organic extract in the suspension were concentrated in vacuo to yield corresponding N-formylated as the pure product.

#### 4.2. A Typical procedure for pyrim-UiO-Co(THF) catalysed N-formylation of benzylamine.

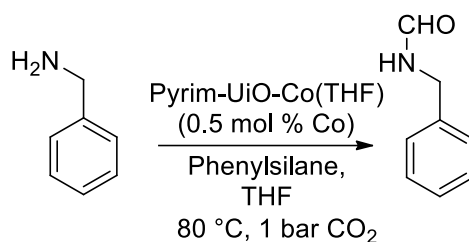

Pyrim-UiO-Co(THF) (0.5 mol% of Co) in 3 ml of THF was transferred into a 50 mL glass liner in a glovebox. To the mixture, benzylamine (40  $\mu$ L, 0.375 mmol) and 80  $\mu$ L phenylsilane were added. Then, the liner was fitted in a Parr reactor and sealed. The sealed Parr reactor was taken out from the glovebox and purged it with CO<sub>2</sub> gas two to three times. The Parr reactor was pressurized to 1.0 bar CO<sub>2</sub> and stirred at room temperature for 16 h. After the completion of the reaction, the pressure of the reactor was released. The solid MOF was removed from suspension inside the glove box, washed with THF multiple times, and reused. The combined organic extracts were concentrated in vacuo, followed by column chromatography using hexane and ethyl acetate (50:1, R<sub>f</sub>: 0.7) as an eluent to yield *N*-benzylformamide as the pure product (0.045 g, 0.335 mmol, 89%).

**Table S1. Optimization reaction conditions for the *N*-formylation of benzylamine.<sup>a</sup>**

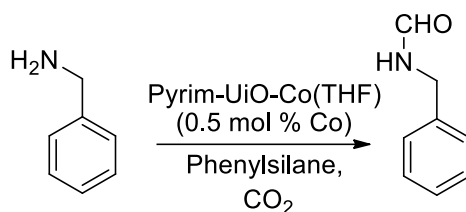

| Entry    | Catalyst                            | Reductant                       | Temperature (°C) | P <sub>CO2</sub> (bar) | Time (h)    | Solvent     | GC-Yield (%) |
|----------|-------------------------------------|---------------------------------|------------------|------------------------|-------------|-------------|--------------|
| 1        | Pyrim-UiO-Co(THF) (0.5 mol%)        | Phenylsilane (1.5 eq)           | 25               | 20                     | 20 h        | THF         | 58           |
| 2        | Pyrim-UiO-Co(THF) (0.5 mol%)        | Phenylsilane (1.5 eq)           | 50               | 20                     | 20 h        | THF         | 73           |
| 3        | Pyrim-UiO-Co(THF) (0.5 mol%)        | Phenylsilane (1.5 eq)           | 100              | 20                     | 20 h        | THF         | 78           |
| 4        | Pyrim-UiO-Co(THF) (0.5 mol%)        | Phenylsilane (1.5 eq)           | 80               | 20                     | 16 h        | THF         | 85           |
| 5        | Pyrim-UiO-Co(THF) (0.5 mol%)        | Phenylsilane (2 eq)             | 80               | 20                     | 16 h        | THF         | 91           |
| 6        | Pyrim-UiO-Co(THF) (0.5 mol%)        | Phenylsilane (2 eq)             | 80               | 10                     | 16 h        | THF         | 92           |
| 7        | Pyrim-UiO-Co(THF) (0.5 mol%)        | Phenylsilane (2 eq)             | 80               | 5                      | 16 h        | THF         | 92           |
| <b>8</b> | <b>Pyrim-UiO-Co(THF) (0.5 mol%)</b> | <b>Phenylsilane (2 eq)</b>      | <b>80</b>        | <b>1</b>               | <b>16 h</b> | <b>THF</b>  | <b>91</b>    |
| 9        | Pyrim-UiO-Co(THF) (0.5 mol%)        | Phenylsilane (2.3 eq)           | 80               | 1                      | 16 h        | THF         | 89           |
| 10       | Pyrim-UiO-Co(THF) (0.5 mol%)        | Phenylsilane (2 eq)             | 80               | 20                     | 16 h        | 1,4-Dioxane | 86           |
| 11       | Pyrim-UiO-Co(THF) (0.5 mol%)        | Phenylsilane (2 eq)             | 80               | 20                     | 16 h        | Heptane     | 62           |
| 12       | Pyrim-UiO-Co(THF) (0.5 mol%)        | Phenylsilane (2 eq)             | 80               | 20                     | 16 h        | Toluene     | 69           |
| 13       | Pyrim-UiO-Co(THF) (0.5 mol%)        | (MeO) <sub>2</sub> MeSiH (2 eq) | 80               | 5                      | 16 h        | THF         | 21           |
| 14       | No catalyst                         | Phenylsilane (2 eq)             | 80               | 5                      | 16 h        | THF         | 5            |

#### 4.3. Test for “heterogeneity” of pyrim-UiO-Co(THF) in *N*-formylation of amines.

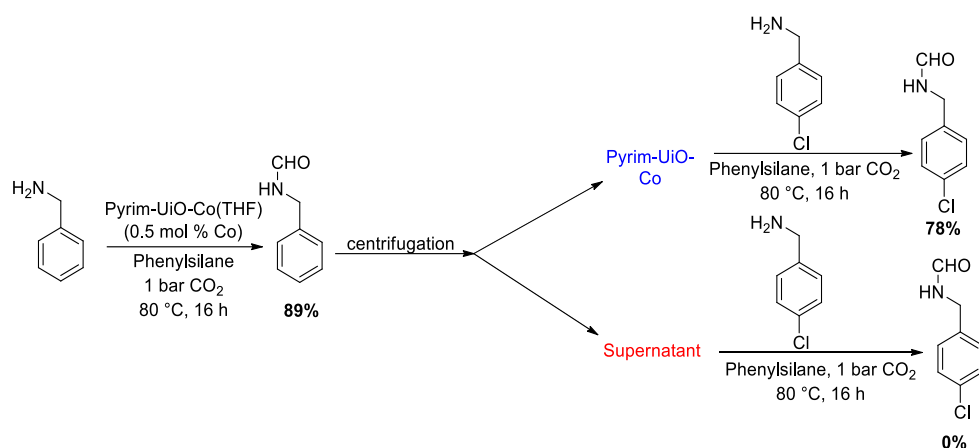

**Figure S4.** Heterogeneity test of pyrim-UiO-Co(THF) for the *N*-formylation of amines.

Pyrim-UiO-Co(THF) (0.5mol% of Co) in 3 ml of THF was transferred into a 50 mL glass liner in a glovebox. To the mixture, benzylamine (40  $\mu$ l, 0.375 mmol) and 80  $\mu$ l phenylsilane were added. Then, the liner was fitted in a Parr reactor and sealed. The sealed Parr reactor was taken out from the glovebox and purged it with CO<sub>2</sub> gas two to three times. The Parr reactor was pressurized to 1 bar CO<sub>2</sub> and stirred at 80°C for 16 h. After the completion of the reaction, the pressure of the reactor was released. The solid MOF was removed from suspension to separate the solid and the supernatant, inside the glove box and washed with THF multiple times. The conversion analysed by taking aliquots from the organic extract gave 89% of *N*-benzylformamide.

Two reactions were set up separately in two different Parr reactors, one with the solid and the other one with the supernatant recovered from the previous reaction. The extracted solid and supernatant were added into two separate liners, and *p*-chlorobenzylamine (45  $\mu$ l, 0.375 mmol), 90  $\mu$ l phenylsilane, and 3 mL of THF were added to each liner. Then both the liners were fitted into two separate Parr reactors and sealed. The sealed Parr reactor was taken out from the glovebox and purged it with CO<sub>2</sub> gas two times. The Parr reactor was pressurized to 1 bar CO<sub>2</sub> and stirred at 80°C for 16 h. After the completion of the reaction, the pressure of the reactors was released. The reactions were analysed with the GC-MS, which showed that the reaction with the solid MOF gave 100% conversion with 78% yield, while the reaction with supernatant gave 0% conversion. This experiment excludes the potential of any leached Co-species responsible for catalysis and confirms that solid pyrim-UiO-Co(THF) was the actual catalyst for the *N*-formylation of amines.

**4.4. Hg test.** A catalytic *N*-formylation of amine was carried out in the presence of a drop of Hg to investigate the role of any leached Co-nanoparticles in the solution responsible for catalysis. Hg is known to form an amalgam with metallic cobalt, thus removing any in-situ-borne metallic cobalt during catalysis. The details of the experiments are as follows:

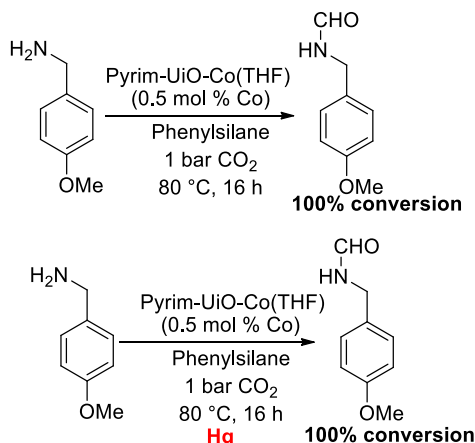

**Figure S5.** Hg test in the *N*-formylation of p-methoxybenzylamine with pyrim-UiO-Co(THF).

Pyrim-UiO-Co(THF) (0.5 mol % of Co) was charged into two separate 3 mL vials and washed with THF multiple times inside the glovebox. The MOF as a slurry in 3 mL THF was transferred to the two separate 50 mL glass liners. p-Methoxybenzylamine (51  $\mu$ l, 0.375 mmol), 90  $\mu$ l phenylsilane and 3 mL of THF was added to both the liners. In one of the reaction mixtures, a drop of mercury was added. Then, the liners were fitted in a Parr reactor and sealed. The sealed Parr reactors were taken out from the glovebox and purged it with CO<sub>2</sub> gas two times, then pressurized with 1 bar CO<sub>2</sub>. The reactors were then stirred at 80 °C for 16 h. After the completion of the reaction, the pressure of the reactor was released. The solid MOF was removed from suspension inside the glove box and washed with THF multiple times. The catalytical conversion was 100% for both the reactions analysed by GC-MS. We thus conclude that any leached Co-particles were not responsible for the catalytical activity, and pyrim-UiO-Co(THF) was the actual catalyst.

#### 4.5. Recycling of pyrim-UiO-Co(THF) for the *N*-formylation of benzylamines.

The recycle and reuse experiment was conducted at incomplete conversion (~50-60%) to check the stability of the pyrim-UiO-Co(THF) catalyst at various runs (Table S2). The detailed procedure of recycling experiment is given below.

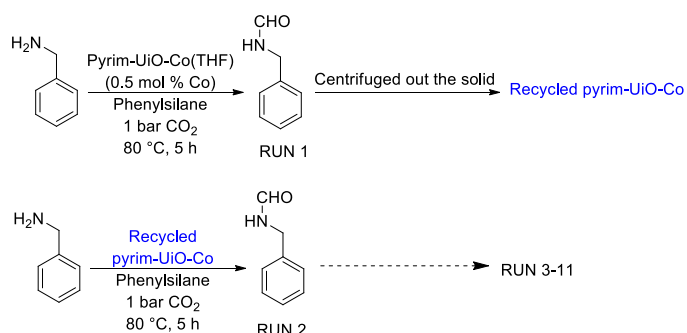

**Figure S6.** Recycle and reuse of pyrim-UiO-Co(THF) in N-formylation of benzylamine.

Pyrim-UiO-Co(THF) (0.5 mol% of Co) into 3ml vial was taken inside the glovebox and wash it with THF for one to three times. The MOF as a slurry in THF was transferred to the 50 ml glass tube. To the mixture, 3 ml THF and benzylamine (40  $\mu$ L, 0.375 mmol) were added, and the glass tube was sealed in a Parr reactor. The Parr reactor was taken out from the glove box and purged two times with the CO<sub>2</sub> gas. The reactor was pressurized with 1 bar CO<sub>2</sub> and heated to 80 °C for 5 h. After cooling the reactor to room temperature, the reactor was taken inside the glove box, and released the pressure. The solid was centrifuged out of the suspension and washed with the THF. The organic extract was concentrated under vacuo to give the pure formylated product. The solid MOF was then recycled.

Inside the glovebox, the recovered MOF-catalyst was again added to the glass tube. 3 ml THF and benzylamine (40  $\mu$ L, 0.375 mmol) were added to the glass tube and sealed it in a Parr reactor. The Parr reactor was taken out from the glove box and was purged with the CO<sub>2</sub> gas and then pressurized it to 1 bar of CO<sub>2</sub>. The solution was heated at 80 °C for 5 h. After the reaction, the solution was analyzed in the same way as mentioned previously in run 1. The recycling and reuse experiments were performed up to 11 times in total.

**Table S2.** % GC-Yield of N-benzylformamide, the leaching of Co at various runs of the recycling of pyrim-UiO-Co(THF) in the N-formylation of benzylamine.

| No. of Run | Time | %GC-Yield | %Leaching (Co, Zr) |
|------------|------|-----------|--------------------|
| Run-1      | 5 h  | 54        | 0.07, 1.34         |
| Run-2      | 5 h  | 56        |                    |
| Run-3      | 5 h  | 59        |                    |
| Run-4      | 5 h  | 51        |                    |
| Run-5      | 5 h  | 52        | 0.13, 2.11         |
| Run-6      | 5 h  | 58        |                    |
| Run-7      | 5 h  | 52        |                    |
| Run-8      | 5 h  | 51        |                    |
| Run-9      | 5 h  | 53        | 0.14, 2.89         |
| Run-10     | 5 h  | 57        |                    |
| Run-11     | 5 h  | 55        |                    |

**4.6. Investigation of the effect of pore sizes on the rate of catalysis.** The effect of pore sizes on the rate of formylation of amine was investigated by comparing the rate of *N*-formylation reactions of amines catalyzed by pyrim-UiO-Co(THF) with that of pyrim-UiO-66-Co under identical reaction conditions. Pyrim-UiO-66-Co has the same topology but smaller pore sizes compared to pyrim-UiO-Co(THF).

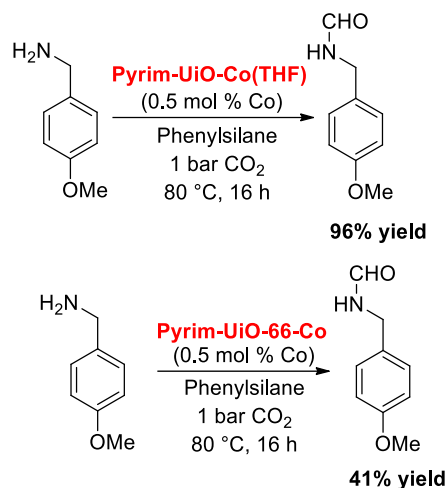

**Figure S7.** The *N*-formylation of 4-methoxybenzylamine catalyzed by pyrim-UiO-Co(THF) with that of pyrim-UiO-66-Co under identical reaction conditions.

pyrim-UiO-66-Co was synthesized according to the reported procedure.<sup>5</sup> Two separate 5 ml vials were charged with pre-activated pyrim-UiO-Co(THF) (0.5 mol% of Co) and pyrim-UiO-66-Co (0.5 mol% of Co) each and washed with THF multiple times. Each MOF slurry in 3 ml THF were transferred to two different 50 ml glass liners containing 4-methoxybenzylamine (51  $\mu\text{l}$ , 0.375 mmol) and 90  $\mu\text{l}$  of phenylsilane. The liners were fitted into the Parr reactors and sealed properly. The sealed Parr reactors were taken out from the glove box. The reactors were purged twice with the  $\text{CO}_2$ , then charged with 1 bar  $\text{CO}_2$  each and stirred at 80 °C for 16 h. After the completion of the reaction, the pressure from the reactors was released. The solid MOF was then removed from suspension inside the glove box and the combined organic extracts were evaporated and analysed by GC-MS. The catalytical conversions for both the reactions were 100% while, the selectivity to get *N*-(4-methoxyphenyl)formamide were 96% and 41% with pyrim-UiO-Co(THF) and pyrim-UiO-66-Co respectively. This experiment indicates that the larger pore size MOF, pyrim-UiO-Co(THF), was about three times more active than pyrim-UiO-66-Co in formylation of benzyl amine presumably due to the facile diffusion of reactant and product through its larger channels.

**5. Determination of the rate law for pyrim-UiO-Co(THF) catalysed *N*-formylation of benzylamine.** The rate law for *N*-formylation of benzylamine was determined by the method of initial rates (up to 10% conversion).<sup>6</sup> The reactions were conducted in THF (total volume of solution was 3.0 mL) in a Parr reactor at 80 °C. For each kinetic experiment, a glass liner was charged with MOF-catalyst, benzylamine, phenylsilane and THF under N<sub>2</sub>. The liner was fitted in a Parr reactor and sealed properly, pressurized with CO<sub>2</sub> and heated at 80 °C for 30 min. The concentration of the product was analysed by GC-FID using mesitylene as internal standard. The initial rates for the *N*-formylation of benzylamine were measured for several substrate concentrations at constant catalyst concentration. Linear regression fits for [benzylamine] versus time for the first 30 min of the reaction provided the initial rate ( $d[\text{benzylamine}]/dt$ ) for a particular initial substrate concentration. To determine the rate dependence on one reagent, the concentration of that reagent was varied, while the concentration of other reagents, pressure, and the total volume of solution (3.0 mL) were kept constant. The rate dependence on CO<sub>2</sub> pressure was measured, while keeping all the reagents constant and varying CO<sub>2</sub> pressure. The rates refer to the rates of consumption of benzylamine in units of mM·min<sup>-1</sup>. To determine the rate dependence on the catalyst, the concentration of Co was varied between  $6.01 \times 10^{-4}$  to  $2.4 \times 10^{-3}$  mM, while the initial concentrations of benzylamine were  $1.83 \times 10^{-1}$  mM, concentration of phenylsilane was  $1.6 \times 10^{-1}$  mM and CO<sub>2</sub> pressure was 5 bar. To determine the rate dependence on benzylamine, initial concentration of phenylsilane was  $1.6 \times 10^{-1}$  mM and CO<sub>2</sub> pressure was 5 bar, while the concentration of benzylamine was varied between  $9.1 \times 10^{-2}$  mM to  $3.6 \times 10^{-1}$  mM, while the concentration of Co was  $6.01 \times 10^{-4}$  mM. To determine the rate dependence on pressure of CO<sub>2</sub>, the concentrations of benzylamine were  $1.83 \times 10^{-1}$  mM, concentration of phenylsilane was  $1.6 \times 10^{-1}$  mM, and CO<sub>2</sub> pressure was varied from 5-20 bar, while the concentration of Co was  $6.01 \times 10^{-4}$  mM. To determine the rate dependence on phenylsilane, the concentrations of phenylsilane was varied between  $2.4 \times 10^{-1}$  mM to  $4.8 \times 10^{-1}$  mM, while initial concentration of benzylamine were  $1.83 \times 10^{-1}$  mM, concentration of Co was  $6.01 \times 10^{-4}$  mM, and CO<sub>2</sub> pressure was 5 bar.

**6. Analysis of products by GC-MS.** The conversions and yields of the reactions were determined by Agilent 7890B gas chromatograph equipped with a mass detector (Agilent 5977B GC/MSD) and HP-5MS Ultra Inert 30 m-250  $\mu$ m-0.25  $\mu$ m column for GC-MS. GC-MS conditions: Inj: 220 °C; Det: 250 °C; Column temp: 80 °C followed by a ramp of 5 °C/min to 220 °C; Column flow: 1.0 mL/min.

**Table S3. The GC-MS retention times of the arene substrates and the products.**

| Entry | Substrate                                                                           | Retention time | Product                                                                              | Retention time |
|-------|-------------------------------------------------------------------------------------|----------------|--------------------------------------------------------------------------------------|----------------|
| 1     | 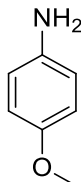   | 9.86           | 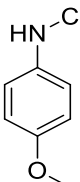   | 18.1           |
| 2     | 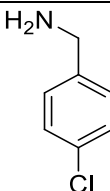   | 9.50           | 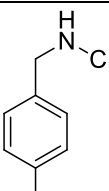   | 9.92           |
| 3     | 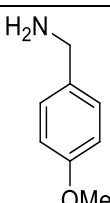   | 10.95          | 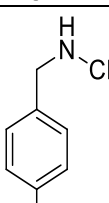   | 20.3           |
| 4     | 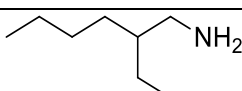  | 5.17           | 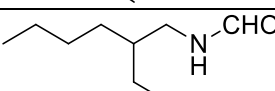  | 13.23          |
| 5     | 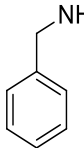 | 5.50           | 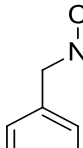 | 14.3           |
| 6     | 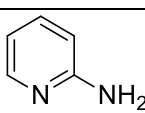 | 5.23           | 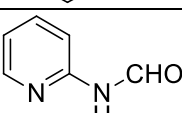 | 10.58          |
| 7     | 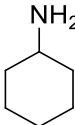 | 3.49           | 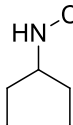 | 11.8           |
| 8     | 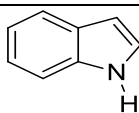 | 11.52          | 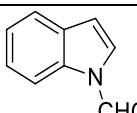 | 13.6           |
| 9     | 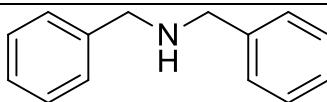 | 16.30          | 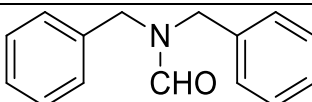 | 27.0           |
| 10    | 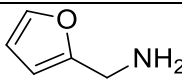 | 3.24           | 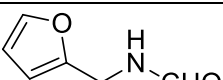 | 9.18           |

|    |                                                                                     |       |                                                                                      |       |
|----|-------------------------------------------------------------------------------------|-------|--------------------------------------------------------------------------------------|-------|
| 11 | 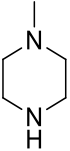   | 3.4   | 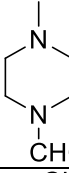  | 9.42  |
| 12 | 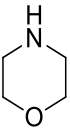   | 2.98  | 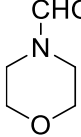  | 7.49  |
| 13 | 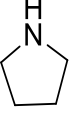   | 3.1   | 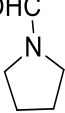  | 6.73  |
| 14 | 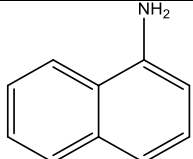   | 17.56 | 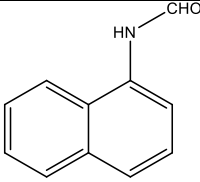   | 20.05 |
| 15 | 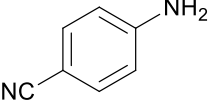   | 15.55 | 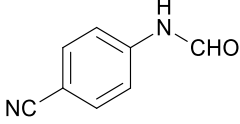   | 22.20 |
| 16 | 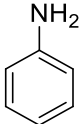  | 4.91  | 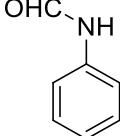  | 12.07 |
| 17 | 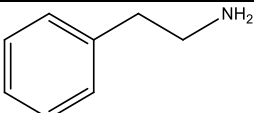 | 7.3   | 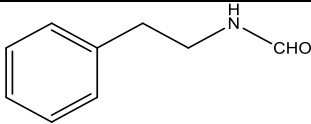 | 16.07 |
| 18 | 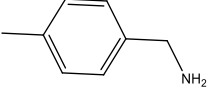 | 7.37  | 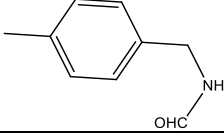 | 16.62 |
| 19 | 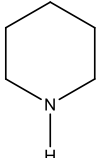 | 3.2   | 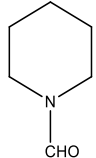 | 7.99  |
| 20 | 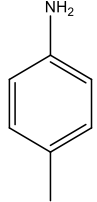 | 6.51  | 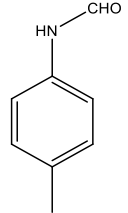 | 14.90 |

**7.1. X-ray absorption spectroscopic analysis.** X-ray Near-Edge Structure (XANES) and Extended X-ray Absorption Fine Structure (EXAFS) measurements have been carried out at the Energy-Scanning EXAFS beamline (BL-9) at the Indus-2 Synchrotron Source at Raja Ramanna Centre for Advanced Technology (RRCAT), Indore, India.<sup>7</sup> All the measurements were performed at room temperature. This beamline operates in the energy range of 4 keV to 25 keV. The beamline optics consist of a Rh/Pt coated collimating meridional cylindrical mirror and the collimated beam reflected by the mirror is monochromatized by a Si(111) based double crystal monochromator (DCM). The second crystal of the DCM is a sagittal cylindrical crystal which is used for horizontal focusing of the beam while another Rh/Pt coated bendable post mirror facing downward is used for vertical focusing of the beam at the sample position. Two ionization chambers (300 mm length each) have been used for data collection in the transmission mode; one ionization chamber for measuring incident flux, the second one for measuring transmitted flux. For energy calibration, standard metal foils were used. Appropriate gas pressure and gas mixture have been chosen to achieve 10-20% absorption in the first ionization chamber and 70-90% absorption in the second ionization chamber to obtain a better signal-to-noise ratio. Pellets were made from powder samples for recording absorption spectra. Sample powder was mixed homogeneously with cellulose powder in appropriate proportion and pressed (2 Ton) into a 15 mm diameter disc. The amount of the sample was estimated such that to get a reasonable edge jump at a particular absorption edge of the element to be probed. Spectra were collected at the cobalt K-edge in transmission mode and were calibrated against the reference spectrum of metallic cobalt (7709 eV). Data were processed using Demeter software.<sup>8</sup> A metallic cobalt foil standard was used as a reference for energy calibration and was measured simultaneously with experimental samples.

**7.2. XANES analysis.** The oxidation state of the Co species within pyrim-UiO-CoCl<sub>2</sub>, pyrim-UiO-Co(THF) and pyrim-UiO-Co after catalysis was determined by the comparison of the energies of their pre-edge and K-edge positions to those of CoCl<sub>2</sub>. The position of the pre-edge and K-edge of pyrim-UiO-CoCl<sub>2</sub> aligned well with those of CoCl<sub>2</sub>. Therefore, we assign the oxidation state of cobalt in pyrim-UiO-CoCl<sub>2</sub> as +2. However, in the case of pyrim-UiO-Co(THF), the pre-edge is at 7706 eV, which is 3 eV lower than that of pyrim-UiO-CoCl<sub>2</sub> and CoCl<sub>2</sub>. We thus infer that the oxidation state of cobalt ion in pyrim-UiO-Co(THF) is zero. However, the Co K-edge of pyrim-UiO-Co(THF) is 3 eV higher than that of metallic cobalt(0). The higher Co K-edge energy in XANES of pyrim-UiO-Co(THF) than that of metallic cobalt(0) is attributed to the electron backdonation from d<sub>π</sub>(Co) to p<sub>π</sub><sup>\*</sup>(pyrim).

**7.3. EXAFS fitting using DFT optimized structures.** The spectra were calibrated against the reference spectra and aligned to the first peak in the smoothed first derivative of the absorption spectrum, the background noise was removed, and the spectra were processed to obtain a normalized unit edge step. The fitting parameters of pyrim-UiO- $\text{CoCl}_2$ , pyrim-UiO- $\text{Co}(\text{THF})$  and pyrim-UiO- $\text{Co}$  after catalytic amine formylation are summarized in Table S5, Table S7 and Table S8, respectively.

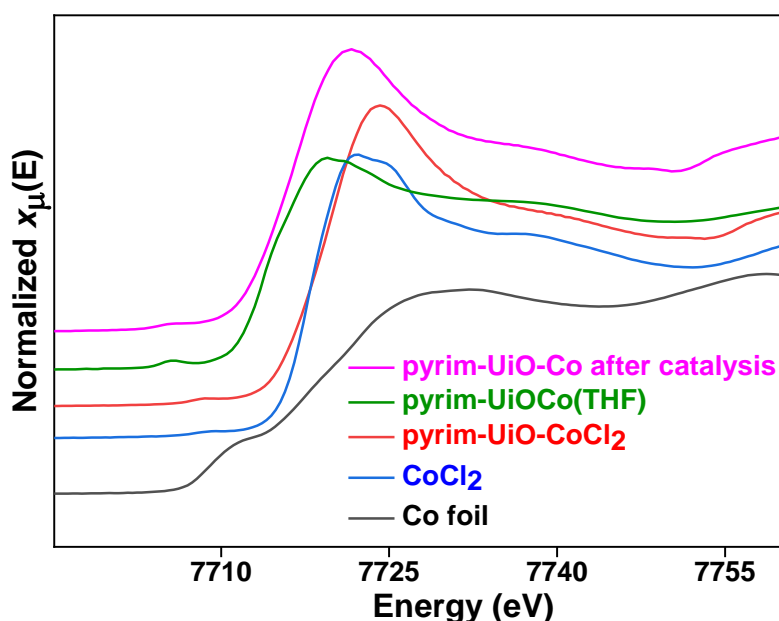

**Figure S8.**  $\mu(\text{E})$  XAS spectra of metallic  $\text{Co}(0)$  (black),  $\text{CoCl}_2$  (blue), pyrim-UiO- $\text{CoCl}_2$  (red), pyrim-UiO- $\text{Co}(\text{THF})$  (green), and pyrim-UiO- $\text{Co}$  after catalysis (magenta).

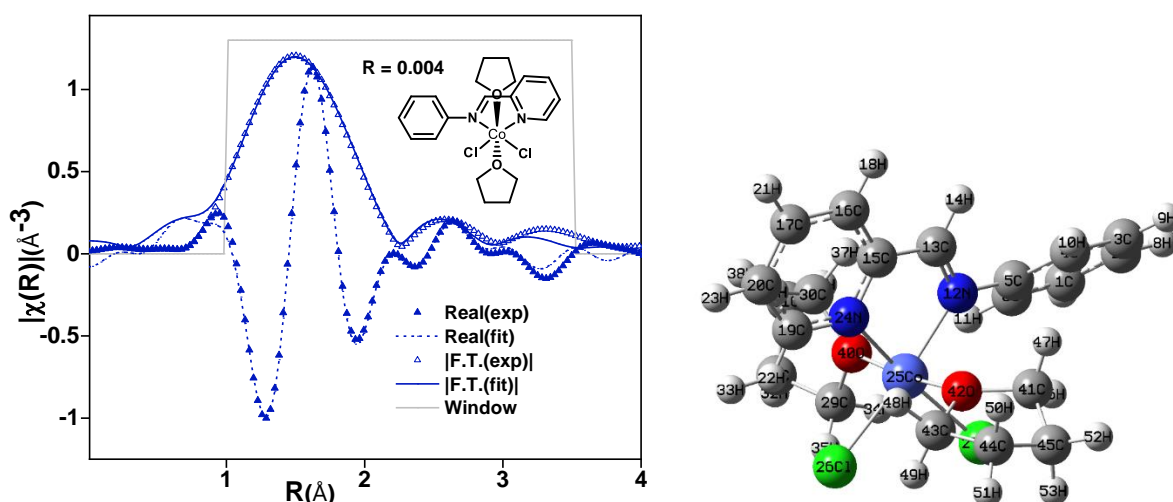

**Figure S9.** (a) EXAFS spectrum and fit of pyrim-UiO- $\text{CoCl}_2$ . (b) DFT-optimized structure of  $(\text{pyrim})\text{CoCl}_2(\text{THF})_2$ .

**Table S4. Atoms coordinates used for EXAFS fitting parameters of pyrim-UiO-CoCl<sub>2</sub>(THF)<sub>2</sub>**

| Atom No. | Atomic symbol | Coordinates |          |           |
|----------|---------------|-------------|----------|-----------|
|          |               | X           | Y        | Z         |
| 40       | O             | -4.447735   | 5.373369 | -1.680895 |
| 42       | O             | -4.877530   | 6.507511 | 1.762643  |
| 24       | N             | -4.909663   | 7.654624 | -0.641159 |
| 12       | N             | -2.988274   | 5.804915 | 0.393602  |
| 27       | Cl            | -4.760357   | 3.884170 | 0.741058  |
| 26       | Cl            | -6.839608   | 5.744080 | -0.111420 |
| 13       | C             | -2.415042   | 7.121739 | 0.080106  |
| 15       | C             | -3.576187   | 8.017402 | -0.451994 |
| 19       | C             | -5.807343   | 8.564116 | -1.200985 |
| 5        | C             | -1.932672   | 4.921036 | 0.908734  |
| 29       | C             | -3.422031   | 4.424689 | -2.284218 |
| 30       | C             | -5.329810   | 5.888267 | -2.809274 |
| 43       | C             | -5.911598   | 7.471113 | 1.982044  |
| 41       | C             | -4.268926   | 6.133321 | 3.001813  |

**Table S5. Summary of EXAFS fitting parameters of pyrim-UiO-CoCl<sub>2</sub>(THF)<sub>2</sub>.**

| Sample             | Pyrim-CoCl <sub>2</sub> (THF) <sub>2</sub> | Fitting range                              | $k$ 3-13 Å <sup>-1</sup><br>R 1.0-3.5 Å |
|--------------------|--------------------------------------------|--------------------------------------------|-----------------------------------------|
| Independent points | 13                                         | R-factor                                   | 0.004                                   |
| Variables          | 11                                         | S <sub>0</sub> <sup>2</sup>                | 0.7                                     |
| Reduced chi-square | 40                                         | ΔE <sub>0</sub> (eV)                       | 7.8                                     |
| R(Co-O40)          | 2.20±0.08                                  | σ <sup>2</sup> (Co-O40) (Å <sup>2</sup> )  | 0.003±0.002                             |
| R(Co-O42)          | 2.20±0.08                                  | σ <sup>2</sup> (Co-O42) (Å <sup>2</sup> )  | 0.003±0.002                             |
| R(Co-N24)          | 2.05±0.08                                  | σ <sup>2</sup> (Co-N24) (Å <sup>2</sup> )  | 0.003±0.002                             |
| R(Co-N12)          | 2.05±0.08                                  | σ <sup>2</sup> (Co-N12) (Å <sup>2</sup> )  | 0.003±0.002                             |
| R(Co-Cl27)         | 2.30±0.08                                  | σ <sup>2</sup> (Co-Cl27) (Å <sup>2</sup> ) | 0.003±0.002                             |
| R(Co-Cl26)         | 2.30±0.08                                  | σ <sup>2</sup> (Co-Cl26) (Å <sup>2</sup> ) | 0.003±0.002                             |
| R(Co-C13)          | 2.80±0.08                                  | σ <sup>2</sup> (Co-C13) (Å <sup>2</sup> )  | 0.01±0.001                              |
| R(Co-C15)          | 2.80±0.08                                  | σ <sup>2</sup> (Co-C15) (Å <sup>2</sup> )  | 0.01±0.001                              |
| R(Co-C19)          | 3.03±0.02                                  | σ <sup>2</sup> (Co-C19) (Å <sup>2</sup> )  | 0.0009±0.0001                           |
| R(Co-C5)           | 3.03±0.02                                  | σ <sup>2</sup> (Co-C5) (Å <sup>2</sup> )   | 0.0009±0.0001                           |

|                  |           |                                                                   |               |
|------------------|-----------|-------------------------------------------------------------------|---------------|
| <b>R(Co-C29)</b> | 3.30±0.09 | <b><math>\sigma^2</math> (Co-C29) (<math>\text{\AA}^2</math>)</b> | 0.006±0.002   |
| <b>R(Co-C30)</b> | 3.30±0.09 | <b><math>\sigma^2</math> (Co-C30) (<math>\text{\AA}^2</math>)</b> | 0.006±0.002   |
| <b>R(Co-C43)</b> | 3.50±0.1  | <b><math>\sigma^2</math> (Co-C43) (<math>\text{\AA}^2</math>)</b> | 0.0009±0.0001 |
| <b>R(Co-C41)</b> | 3.50±0.1  | <b><math>\sigma^2</math> (Co-C41) (<math>\text{\AA}^2</math>)</b> | 0.0009±0.0001 |

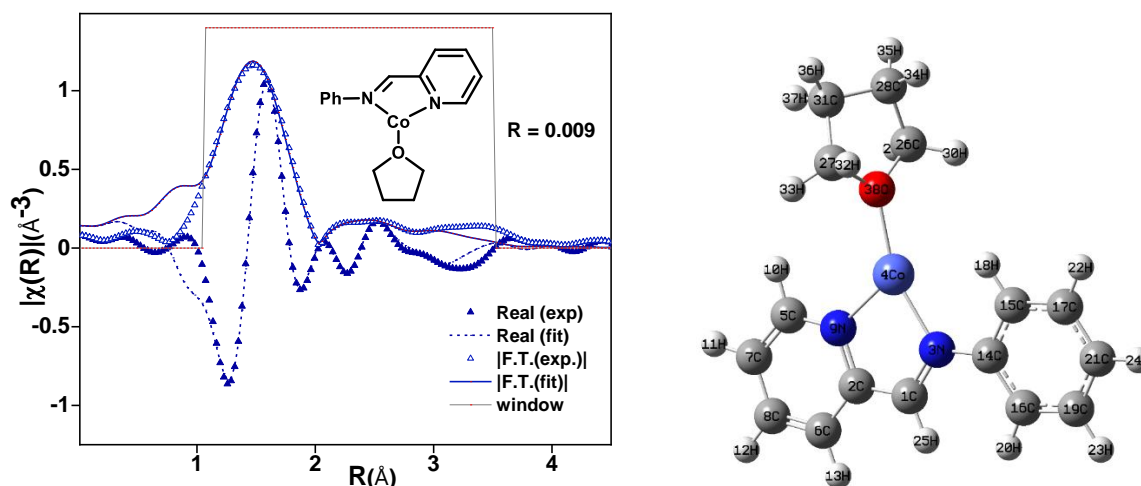

**Figure S10.** (a) EXAFS spectrum and fit of pyrim-UiO-Co(THF). (b) DFT-optimized structure of pyrim-Co(THF) for EXAFS fitting.

**Table S6.** Atoms coordinates used for EXAFS fitting parameters of pyrim-UiO-Co(THF).

| Atom No. | Atomic symbol | Coordinates |           |            |
|----------|---------------|-------------|-----------|------------|
|          |               | X           | Y         | Z          |
| 3        | N             | -14.374835  | -5.415588 | -14.024619 |
| 9        | N             | -13.605732  | -3.382893 | -12.633045 |
| 38       | O             | -14.189606  | -1.850014 | -15.451178 |
| 18       | H             | -14.963245  | -4.928159 | -16.493752 |
| 1        | C             | -14.055855  | -5.688267 | -12.732106 |
| 2        | C             | -13.630021  | -4.603214 | -11.958672 |
| 26       | C             | -15.317565  | -0.924717 | -15.486769 |
| 27       | C             | -13.009946  | -1.249122 | -16.068291 |
| 5        | C             | -13.202945  | -2.283393 | -11.968703 |
| 15       | C             | -15.101275  | -5.974445 | -16.235262 |
| 33       | H             | -12.167193  | -1.401441 | -15.394939 |
| 30       | H             | -16.198516  | -1.491432 | -15.785424 |
| 14       | C             | -14.813048  | -6.382911 | -14.910811 |

**Table S7. Summary of EXAFS fitting parameters of pyrim-UiO-Co(THF).**

| Sample             | Pyrim-UiO-Co(THF) | Fitting range                             | $k$ 3-13 Å <sup>-1</sup><br>R 1.1-3.5 Å |
|--------------------|-------------------|-------------------------------------------|-----------------------------------------|
| Independent points | 13                | R-factor                                  | 0.009                                   |
| Variables          | 8                 | S <sub>0</sub> <sup>2</sup>               | 1.1                                     |
| Reduced chi-square | 140               | ΔE <sub>0</sub> (eV)                      | 2.43                                    |
| R(Co-N3)           | 1.92±0.1          | σ <sup>2</sup> (Co-N3) (Å <sup>2</sup> )  | 0.003±0.002                             |
| R(Co-N9)           | 1.92±0.1          | σ <sup>2</sup> (Co-N9) (Å <sup>2</sup> )  | 0.003±0.002                             |
| R(Co-O38)          | 1.96±0.09         | σ <sup>2</sup> (Co-O38) (Å <sup>2</sup> ) | 0.003±0.002                             |
| R(Co-H18)          | 2.57±0.09         | σ <sup>2</sup> (Co-H18) (Å <sup>2</sup> ) | 0.0004±0.0002                           |
| R(Co-C1)           | 2.76±0.1          | σ <sup>2</sup> (Co-C1) (Å <sup>2</sup> )  | 0.002±0.001                             |
| R(Co-C2)           | 2.76±0.1          | σ <sup>2</sup> (Co-C2) (Å <sup>2</sup> )  | 0.002±0.001                             |
| R(Co-C26)          | 2.93±0.1          | σ <sup>2</sup> (Co-C26) (Å <sup>2</sup> ) | 0.002±0.001                             |
| R(Co-C27)          | 2.93±0.1          | σ <sup>2</sup> (Co-C27) (Å <sup>2</sup> ) | 0.002±0.001                             |
| R(Co-C5)           | 3.04±0.09         | σ <sup>2</sup> (Co-C5) (Å <sup>2</sup> )  | 0.0004±0.0002                           |
| R(Co-C15)          | 3.04±0.09         | σ <sup>2</sup> (Co-C15) (Å <sup>2</sup> ) | 0.0004±0.0002                           |
| R(Co-H33)          | 3.08±0.09         | σ <sup>2</sup> (Co-H33) (Å <sup>2</sup> ) | 0.003±0.002                             |
| R(Co-H30)          | 3.08±0.09         | σ <sup>2</sup> (Co-H30) (Å <sup>2</sup> ) | 0.003±0.002                             |
| R(Co-C14)          | 3.13±0.09         | σ <sup>2</sup> (Co-C14) (Å <sup>2</sup> ) | 0.003±0.002                             |

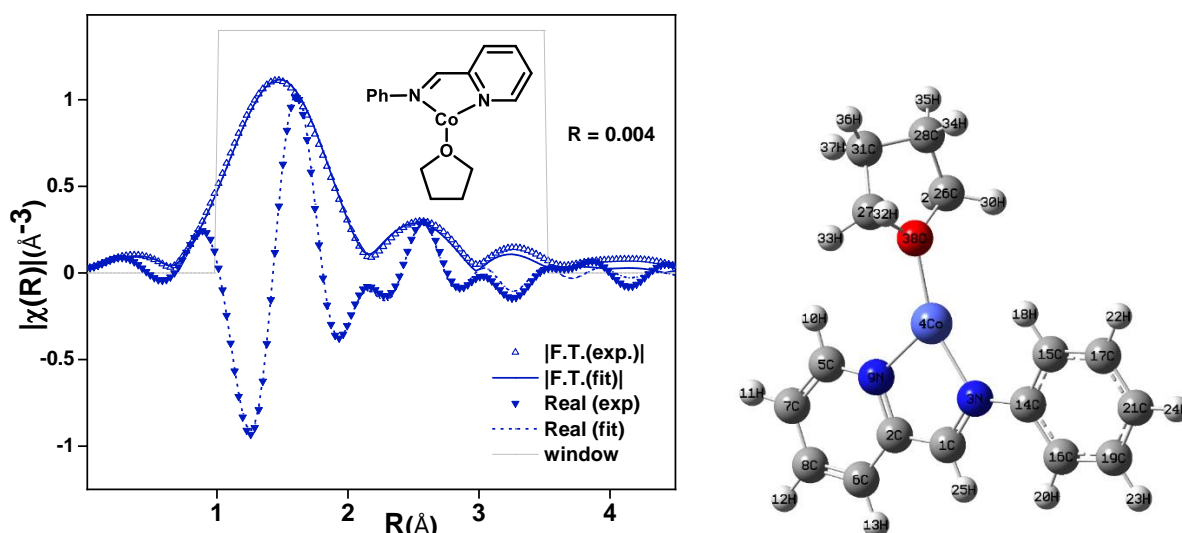

**Figure S11.** (a) EXAFS spectrum and fit of pyrim-UiO-Co recovered after hydroformylation of benzyl amine with PhSiH<sub>3</sub>. (b) DFT-optimized structure of pyrim-Co(THF) for EXAFS fitting.

**Table S8. Summary of EXAFS fitting parameters of pyrim-UiO-Co recovered after hydroformylation of benzyl amine with PhSiH<sub>3</sub>.**

| Sample             | Pyrim-UiO-Co after catalysis | Fitting range                             | $k$ 3-13 Å <sup>-1</sup><br>R 1.1-3.5 Å |
|--------------------|------------------------------|-------------------------------------------|-----------------------------------------|
| Independent points | 13                           | R-factor                                  | 0.004                                   |
| Variables          | 8                            | S <sub>0</sub> <sup>2</sup>               | 1.2                                     |
| Reduced chi-square | 120                          | ΔE <sub>0</sub> (eV)                      | 1.95                                    |
| R(Co-N3)           | 1.92±0.1                     | σ <sup>2</sup> (Co-N3) (Å <sup>2</sup> )  | 0.004±0.003                             |
| R(Co-N9)           | 1.92±0.1                     | σ <sup>2</sup> (Co-N9) (Å <sup>2</sup> )  | 0.004±0.003                             |
| R(Co-O38)          | 1.96±0.1                     | σ <sup>2</sup> (Co-O38) (Å <sup>2</sup> ) | 0.004±0.003                             |
| R(Co-H18)          | 2.57±0.1                     | σ <sup>2</sup> (Co-H18) (Å <sup>2</sup> ) | 0.004±0.003                             |
| R(Co-C1)           | 2.76±0.1                     | σ <sup>2</sup> (Co-C1) (Å <sup>2</sup> )  | 0.004±0.003                             |
| R(Co-C2)           | 2.76±0.1                     | σ <sup>2</sup> (Co-C2) (Å <sup>2</sup> )  | 0.004±0.003                             |
| R(Co-C26)          | 2.93±0.1                     | σ <sup>2</sup> (Co-C26) (Å <sup>2</sup> ) | 0.005±0.003                             |
| R(Co-C27)          | 2.93±0.1                     | σ <sup>2</sup> (Co-C27) (Å <sup>2</sup> ) | 0.005±0.003                             |
| R(Co-C5)           | 3.04±0.1                     | σ <sup>2</sup> (Co-C5) (Å <sup>2</sup> )  | 0.004±0.003                             |
| R(Co-C15)          | 3.04±0.1                     | σ <sup>2</sup> (Co-C15) (Å <sup>2</sup> ) | 0.004±0.003                             |
| R(Co-H33)          | 3.08±0.1                     | σ <sup>2</sup> (Co-H33) (Å <sup>2</sup> ) | 0.004±0.003                             |
| R(Co-H30)          | 3.08±0.1                     | σ <sup>2</sup> (Co-H30) (Å <sup>2</sup> ) | 0.004±0.003                             |
| R(Co-C14)          | 3.13±0.1                     | σ <sup>2</sup> (Co-C14) (Å <sup>2</sup> ) | 0.004±0.003                             |

**8. DFT calculations.** All quantum chemical calculations were conducted using DFT as implemented in the Gaussian 09 software suite of *ab initio* quantum chemistry programs with B3LYP level of theory. Electronic structure complexes were optimized at the unrestricted level using 6-311G (d,p) basis set.<sup>9-13</sup> All energy calculations were performed in solvated state. We used the Polarizable Continuum Model (PCM) using the integral equation formalism variant (IEFPCM) as the default self-consistent reaction field (SCRF)<sup>14,15</sup> approach based on accurate numerical solutions of the Poisson-Boltzmann equation by using tetrahydrofuran (THF) as a solvent in this DFT calculation at 353.15 K temperature. The Gibbs free energies in solution phase  $G(\text{sol})$  at reaction temperature were computed with the following equation (A).

$$\Delta G(\text{sol}) = \Sigma G(\text{sol}) \text{ for products} - \Sigma G(\text{sol}) \text{ for reactants} \dots \text{(A)}$$

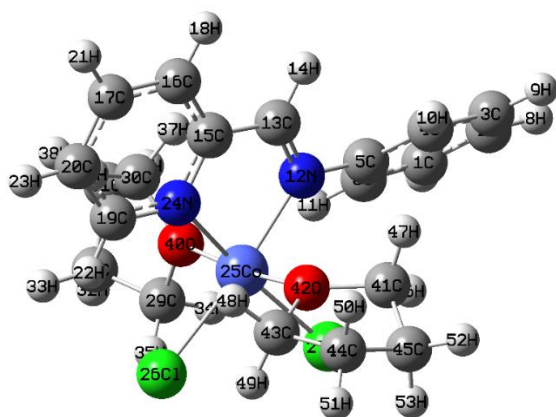

**Figure S12.** DFT-optimized structure of (pyrim)CoCl<sub>2</sub>(THF)<sub>2</sub>.

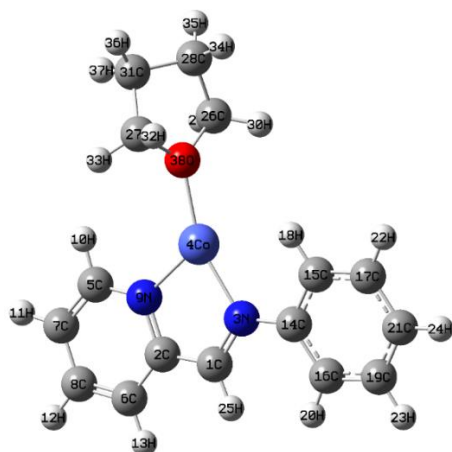

**Figure S13.** DFT-optimized structure of pyrim-UiO-Co(THF) (INT-1).

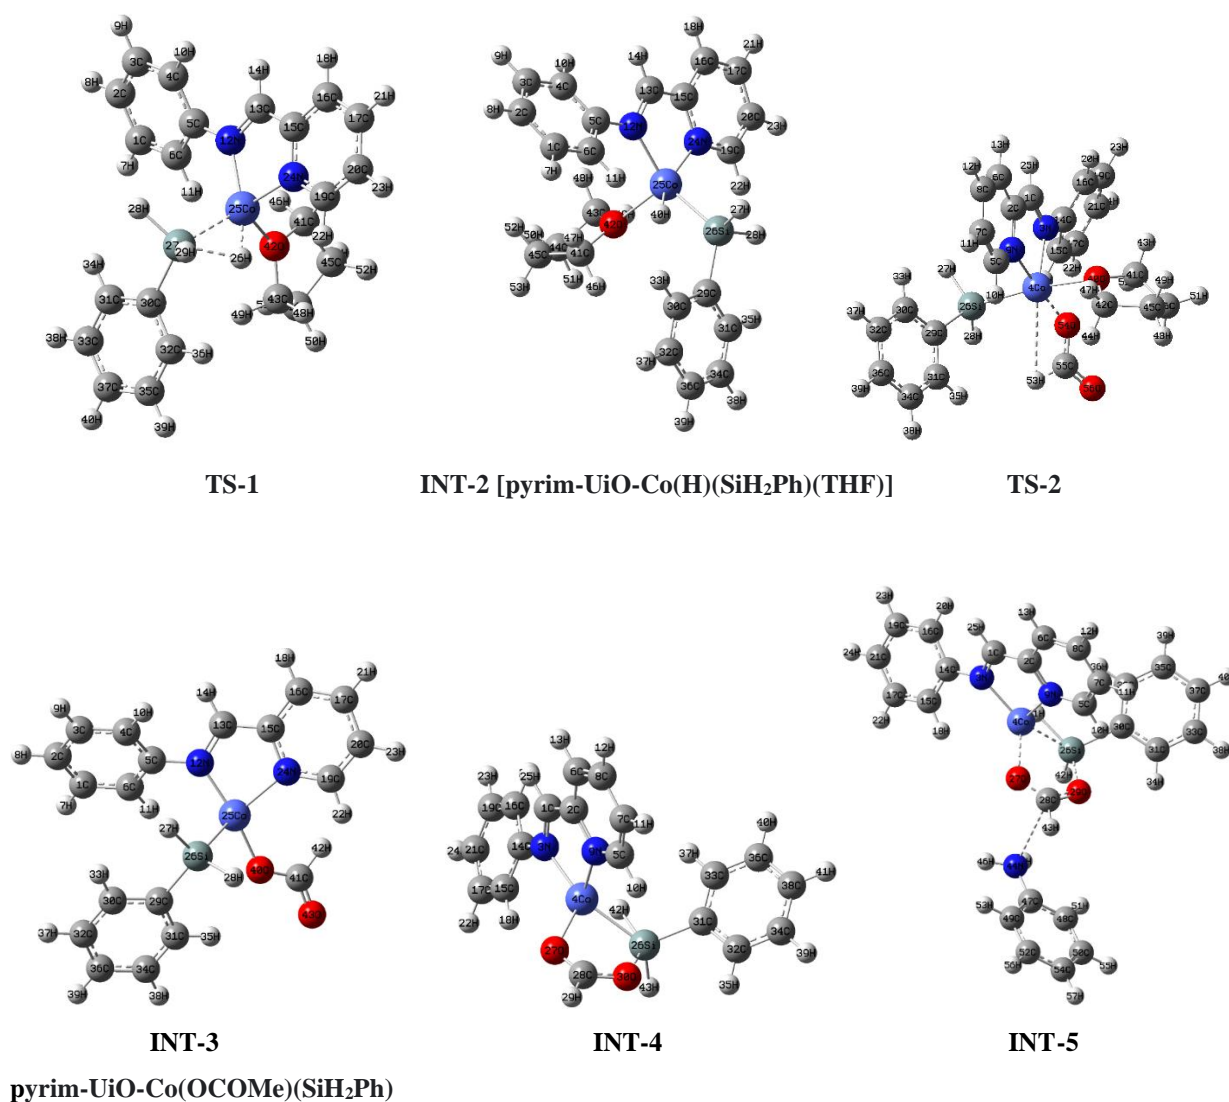

**Figure S14.** DFT-optimized structures of intermediates and transition states of the catalytic cycle in pyrim-UiO-Co catalysed N-formylation of benzyl amine using CO<sub>2</sub> and PhSiH<sub>3</sub>.

### 8.1. Cartesian Coordinates of Optimized Structures

#### Cartesian coordinates of (pyrim)CoCl<sub>2</sub>(THF)<sub>2</sub>

| Atom No. | Atoms | Coordinates (Angstroms) |          |          |
|----------|-------|-------------------------|----------|----------|
|          |       | X                       | Y        | Z        |
| 1        | C     | -1.237099               | 2.771335 | 1.764832 |
| 2        | C     | 0.070429                | 3.242726 | 1.885803 |
| 3        | C     | 0.376197                | 4.553175 | 1.519128 |
| 4        | C     | -0.625575               | 5.392530 | 1.030095 |
| 5        | C     | -1.932672               | 4.921036 | 0.908734 |
| 6        | C     | -2.238564               | 3.610466 | 1.276492 |
| 7        | H     | -1.478050               | 1.738263 | 2.054397 |
| 8        | H     | 0.859584                | 2.581161 | 2.271558 |
| 9        | H     | 1.406656                | 4.924996 | 1.615041 |
| 10       | H     | -0.384237               | 6.425715 | 0.740993 |
| 11       | H     | -3.269117               | 3.239044 | 1.180916 |
| 12       | N     | -2.988274               | 5.804915 | 0.393602 |

|    |    |           |           |           |
|----|----|-----------|-----------|-----------|
| 13 | C  | -2.415042 | 7.121739  | 0.080106  |
| 14 | H  | -1.372874 | 7.303501  | 0.240564  |
| 15 | C  | -3.576187 | 8.017402  | -0.451994 |
| 16 | C  | -3.140194 | 9.289888  | -0.822344 |
| 17 | C  | -4.037694 | 10.199560 | -1.381103 |
| 18 | H  | -2.089017 | 9.575855  | -0.672369 |
| 19 | C  | -5.807343 | 8.564116  | -1.200985 |
| 20 | C  | -5.371632 | 9.836478  | -1.570833 |
| 21 | H  | -3.694254 | 11.202783 | -1.672462 |
| 22 | H  | -6.858578 | 8.277661  | -1.350394 |
| 23 | H  | -6.079083 | 10.553870 | -2.011467 |
| 24 | N  | -4.909663 | 7.654624  | -0.641159 |
| 25 | Co | -4.702576 | 5.918370  | 0.047379  |
| 26 | Cl | -6.839608 | 5.744080  | -0.111420 |
| 27 | Cl | -4.760357 | 3.884170  | 0.741058  |
| 28 | C  | -3.753559 | 4.252472  | -3.759508 |
| 29 | C  | -3.422031 | 4.424689  | -2.284218 |
| 30 | H  | -5.329810 | 5.888267  | -2.809274 |
| 31 | C  | -4.919922 | 5.173359  | -4.088918 |
| 32 | H  | -2.865433 | 4.502184  | -4.392573 |
| 33 | H  | -4.023388 | 3.188404  | -3.977088 |
| 34 | H  | -2.389793 | 4.840292  | -2.163804 |

|    |   |           |          |           |
|----|---|-----------|----------|-----------|
| 35 | H | -3.442493 | 3.437401 | -1.758586 |
| 36 | H | -6.408551 | 5.698075 | -2.581460 |
| 37 | H | -5.208030 | 6.994643 | -2.925437 |
| 38 | H | -5.777942 | 4.584520 | -4.500336 |
| 39 | H | -4.624138 | 5.914817 | -4.872996 |
| 40 | O | -4.447735 | 5.373369 | -1.680895 |
| 41 | C | -4.268926 | 6.133321 | 3.001813  |
| 42 | O | -4.877530 | 6.507511 | 1.762643  |
| 43 | C | -5.911598 | 7.471113 | 1.982044  |
| 44 | C | -6.005289 | 7.766170 | 3.475252  |
| 45 | C | -4.941533 | 6.899848 | 4.135629  |
| 46 | H | -4.398168 | 5.025315 | 3.104885  |
| 47 | H | -3.178997 | 6.377039 | 2.914280  |
| 48 | H | -5.638678 | 8.380541 | 1.387520  |
| 49 | H | -6.858153 | 7.028480 | 1.578172  |
| 50 | H | -5.821674 | 8.850086 | 3.676150  |
| 51 | H | -7.023222 | 7.517902 | 3.863997  |
| 52 | H | -4.197147 | 7.527071 | 4.684654  |
| 53 | H | -5.398694 | 6.194886 | 4.872503  |

### Cartesian coordinates of pyrim-Co(THF)

| Atom No. | Atoms | Coordinates (Angstroms) |           |            |
|----------|-------|-------------------------|-----------|------------|
|          |       | X                       | Y         | Z          |
| 1        | C     | -14.055855              | -5.688267 | -12.732106 |
| 2        | C     | -13.630021              | -4.603214 | -11.958672 |
| 3        | N     | -14.374835              | -5.415588 | -14.024619 |
| 4        | Co    | -14.185806              | -3.552886 | -14.462666 |
| 5        | C     | -13.202945              | -2.283393 | -11.968703 |
| 6        | C     | -13.234667              | -4.660797 | -10.591816 |
| 7        | C     | -12.806513              | -2.287849 | -10.645440 |
| 8        | C     | -12.827835              | -3.521137 | -9.944848  |
| 9        | N     | -13.605732              | -3.382893 | -12.633045 |
| 10       | H     | -13.207626              | -1.361833 | -12.543424 |
| 11       | H     | -12.492248              | -1.370001 | -10.165694 |
| 12       | H     | -12.524565              | -3.561529 | -8.904373  |
| 13       | H     | -13.260806              | -5.615861 | -10.078474 |
| 14       | C     | -14.813048              | -6.382911 | -14.910811 |
| 15       | C     | -15.101275              | -5.974445 | -16.235262 |
| 16       | C     | -15.001559              | -7.752423 | -14.603391 |
| 17       | C     | -15.547101              | -6.871471 | -17.193319 |
| 18       | H     | -14.963245              | -4.928159 | -16.493752 |
| 19       | C     | -15.450019              | -8.643654 | -15.572511 |
| 20       | H     | -14.800637              | -8.121961 | -13.606010 |
| 21       | C     | -15.728088              | -8.221409 | -16.873934 |
| 22       | H     | -15.755868              | -6.517296 | -18.197517 |
| 23       | H     | -15.584915              | -9.686975 | -15.305031 |
| 24       | H     | -16.077034              | -8.924734 | -17.620844 |
| 25       | H     | -14.112324              | -6.683830 | -12.308519 |
| 26       | C     | -15.317565              | -0.924717 | -15.486769 |
| 27       | C     | -13.009946              | -1.249122 | -16.068291 |
| 28       | C     | -14.902184              | 0.156981  | -16.476493 |
| 29       | H     | -15.464997              | -0.530991 | -14.477860 |
| 30       | H     | -16.198516              | -1.491432 | -15.785424 |
| 31       | C     | -13.378387              | 0.215478  | -16.284784 |
| 32       | H     | -12.822783              | -1.774594 | -17.007551 |
| 33       | H     | -12.167193              | -1.401441 | -15.394939 |
| 34       | H     | -15.149105              | -0.144313 | -17.497717 |
| 35       | H     | -15.393550              | 1.108487  | -16.270624 |
| 36       | H     | -12.857691              | 0.643992  | -17.141736 |
| 37       | H     | -13.128477              | 0.807057  | -15.400322 |
| 38       | O     | -14.189606              | -1.850014 | -15.451178 |

### Cartesian coordinates of TS-1

| Atom No. | Atoms | Coordinates (Angstroms) |          |          |
|----------|-------|-------------------------|----------|----------|
|          |       | X                       | Y        | Z        |
| 1        | C     | -2.483847               | 1.867848 | 0.973635 |

|    |    |            |           |           |
|----|----|------------|-----------|-----------|
| 2  | C  | -1.332513  | 1.453769  | 0.300282  |
| 3  | C  | -0.602662  | 2.391100  | -0.431090 |
| 4  | C  | -1.005761  | 3.721567  | -0.492096 |
| 5  | C  | -2.159712  | 4.152961  | 0.192983  |
| 6  | C  | -2.891428  | 3.194402  | 0.922117  |
| 7  | H  | -3.064114  | 1.154085  | 1.548149  |
| 8  | H  | -1.013739  | 0.418886  | 0.340890  |
| 9  | H  | 0.285689   | 2.082187  | -0.971722 |
| 10 | H  | -0.442548  | 4.421051  | -1.097448 |
| 11 | H  | -3.770860  | 3.512565  | 1.472679  |
| 12 | N  | -2.625897  | 5.469827  | 0.177393  |
| 13 | C  | -1.816284  | 6.504680  | -0.117787 |
| 14 | H  | -0.743660  | 6.383914  | -0.223551 |
| 15 | C  | -2.404388  | 7.783748  | -0.205540 |
| 16 | C  | -1.694195  | 8.994588  | -0.396055 |
| 17 | C  | -2.374161  | 10.190006 | -0.416631 |
| 18 | H  | -0.617562  | 8.959864  | -0.515026 |
| 19 | C  | -4.422771  | 8.986158  | -0.068778 |
| 20 | C  | -3.776226  | 10.195468 | -0.242368 |
| 21 | H  | -1.838562  | 11.121281 | -0.559872 |
| 22 | H  | -5.497719  | 8.940295  | 0.063459  |
| 23 | H  | -4.343267  | 11.116743 | -0.248578 |
| 24 | N  | -3.782455  | 7.803967  | -0.057482 |
| 25 | Co | -4.494145  | 6.026824  | 0.287499  |
| 26 | H  | -5.864220  | 5.612152  | 0.655450  |
| 27 | Si | -5.611753  | 5.732368  | -1.086995 |
| 28 | H  | -4.815624  | 4.729167  | -1.876400 |
| 29 | H  | -5.545679  | 7.010234  | -1.849675 |
| 30 | C  | -7.374957  | 5.060269  | -1.109080 |
| 31 | C  | -7.628694  | 3.745414  | -1.530438 |
| 32 | C  | -8.471584  | 5.846658  | -0.717095 |
| 33 | C  | -8.926087  | 3.233528  | -1.561157 |
| 34 | H  | -6.802994  | 3.112891  | -1.840784 |
| 35 | C  | -9.769618  | 5.342488  | -0.749829 |
| 36 | H  | -8.313528  | 6.867997  | -0.382619 |
| 37 | C  | -9.999298  | 4.032377  | -1.172033 |
| 38 | H  | -9.098010  | 2.214475  | -1.890267 |
| 39 | H  | -10.601845 | 5.968988  | -0.447602 |
| 40 | H  | -11.009209 | 3.638164  | -1.197180 |
| 41 | C  | -4.254096  | 4.858370  | 2.854995  |
| 42 | O  | -4.644979  | 6.040868  | 2.151525  |
| 43 | C  | -5.051114  | 7.059907  | 3.069444  |
| 44 | C  | -4.924406  | 6.524767  | 4.491793  |
| 45 | C  | -4.408277  | 5.099104  | 4.352920  |
| 46 | H  | -4.914172  | 4.030436  | 2.489169  |
| 47 | H  | -3.192362  | 4.646155  | 2.567439  |
| 48 | H  | -4.385612  | 7.942802  | 2.888872  |
| 49 | H  | -6.107851  | 7.326930  | 2.810582  |
| 50 | H  | -4.216892  | 7.151407  | 5.088193  |
| 51 | H  | -5.913813  | 6.544589  | 5.011052  |
| 52 | H  | -3.428678  | 4.974188  | 4.876113  |
| 53 | H  | -5.125598  | 4.367369  | 4.798973  |

### Cartesian coordinates of INT-2

| Atom No. | Atoms | Coordinates (Angstroms) |          |          |
|----------|-------|-------------------------|----------|----------|
|          |       | X                       | Y        | Z        |
| 1        | C     | -2.281924               | 1.345968 | 0.833099 |
| 2        | C     | -0.886764               | 1.345968 | 0.833099 |
| 3        | C     | -0.189226               | 2.553719 | 0.833099 |
| 4        | C     | -0.886880               | 3.762228 | 0.831900 |
| 5        | C     | -2.281705               | 3.762150 | 0.831421 |
| 6        | C     | -2.979306               | 2.553944 | 0.832417 |
| 7        | H     | -2.831683               | 0.393651 | 0.833549 |
| 8        | H     | -0.337256               | 0.393455 | 0.834414 |
| 9        | H     | 0.910454                | 2.553799 | 0.833733 |
| 10       | H     | -0.336680               | 4.714371 | 0.831841 |
| 11       | H     | -4.078910               | 2.554127 | 0.832237 |
| 12       | N     | -3.017028               | 5.035021 | 0.830147 |
| 13       | C     | -2.062061               | 6.152579 | 0.829029 |
| 14       | H     | -1.010027               | 5.957326 | 0.829224 |
| 15       | C     | -2.893787               | 7.472344 | 0.836321 |
| 16       | C     | -2.087348               | 8.610094 | 0.795653 |

|    |    |            |           |           |
|----|----|------------|-----------|-----------|
| 17 | C  | -2.669568  | 9.875798  | 0.730561  |
| 18 | H  | -0.992573  | 8.508684  | 0.816249  |
| 19 | C  | -4.865021  | 8.866565  | 0.745094  |
| 20 | C  | -4.058846  | 10.004108 | 0.704912  |
| 21 | H  | -2.033998  | 10.772659 | 0.699137  |
| 22 | H  | -5.959967  | 8.967357  | 0.724886  |
| 23 | H  | -4.517677  | 11.002171 | 0.653528  |
| 24 | N  | -4.282480  | 7.600593  | 0.811200  |
| 25 | Co | -4.615337  | 5.752330  | 0.879604  |
| 26 | Si | -5.278854  | 5.598162  | -1.370596 |
| 27 | H  | -4.177799  | 4.811187  | -1.944397 |
| 28 | H  | -5.197744  | 6.982523  | -1.858311 |
| 29 | C  | -6.974942  | 4.822639  | -1.904871 |
| 30 | C  | -7.024557  | 3.509857  | -2.374567 |
| 31 | C  | -8.144803  | 5.577396  | -1.819347 |
| 32 | C  | -8.243703  | 2.952265  | -2.759267 |
| 33 | H  | -6.101972  | 2.915340  | -2.442598 |
| 34 | C  | -9.364545  | 5.019454  | -2.203194 |
| 35 | H  | -8.105905  | 6.612029  | -1.449007 |
| 36 | C  | -9.414157  | 3.707152  | -2.673235 |
| 37 | H  | -8.282798  | 1.917731  | -3.130088 |
| 38 | H  | -10.286827 | 5.614650  | -2.135266 |
| 39 | H  | -10.375302 | 3.267277  | -2.976559 |
| 40 | H  | -5.899533  | 5.062766  | 0.957119  |
| 41 | C  | -4.638930  | 4.674342  | 3.643914  |
| 42 | O  | -4.864961  | 5.692229  | 2.664742  |
| 43 | C  | -5.436203  | 6.854663  | 3.271694  |
| 44 | C  | -5.606593  | 6.600636  | 4.765663  |
| 45 | C  | -5.090297  | 5.188712  | 5.006703  |
| 46 | H  | -5.221213  | 3.774905  | 3.316862  |
| 47 | H  | -3.543606  | 4.440332  | 3.621341  |
| 48 | H  | -4.737307  | 7.705274  | 3.064312  |
| 49 | H  | -6.415332  | 7.039681  | 2.759757  |
| 50 | H  | -5.026975  | 7.347164  | 5.362058  |
| 51 | H  | -6.680332  | 6.691357  | 5.061979  |
| 52 | H  | -4.238508  | 5.190927  | 5.730166  |
| 53 | H  | -5.891864  | 4.535118  | 5.430088  |

### Cartesian coordinates of TS-2

| Atom No. | Atoms | Coordinates (Angstroms) |            |            |
|----------|-------|-------------------------|------------|------------|
|          |       | X                       | Y          | Z          |
| 1        | C     | -14.662671              | -11.506135 | -10.067179 |
| 2        | C     | -14.095789              | -10.648439 | -9.039356  |
| 3        | N     | -14.997425              | -10.975881 | -11.191271 |
| 4        | Co    | -14.555447              | -8.845570  | -11.134577 |
| 5        | C     | -13.358676              | -8.516018  | -8.499569  |
| 6        | C     | -13.746832              | -11.123176 | -7.774615  |
| 7        | C     | -13.004485              | -8.919150  | -7.219112  |
| 8        | C     | -13.199815              | -10.247584 | -6.846292  |
| 9        | N     | -13.900409              | -9.350965  | -9.402469  |
| 10       | H     | -13.196121              | -7.497330  | -8.827946  |
| 11       | H     | -12.572782              | -8.200345  | -6.535064  |
| 12       | H     | -12.925228              | -10.592218 | -5.857299  |
| 13       | H     | -13.911119              | -12.166023 | -7.533386  |
| 14       | C     | -15.567114              | -11.771912 | -12.213331 |
| 15       | C     | -15.294662              | -11.425894 | -13.542828 |
| 16       | C     | -16.409665              | -12.860978 | -11.940447 |
| 17       | C     | -15.819379              | -12.189309 | -14.580518 |
| 18       | H     | -14.685016              | -10.555992 | -13.741245 |
| 19       | C     | -16.940852              | -13.609310 | -12.985842 |
| 20       | H     | -16.675132              | -13.101515 | -10.917755 |
| 21       | C     | -16.640010              | -13.283805 | -14.308555 |
| 22       | H     | -15.594704              | -11.920813 | -15.606331 |
| 23       | H     | -17.599340              | -14.442071 | -12.766479 |
| 24       | H     | -17.056440              | -13.868518 | -15.120559 |
| 25       | H     | -14.752315              | -12.572218 | -9.859817  |
| 26       | N     | -12.518789              | -8.922117  | -11.962927 |
| 27       | H     | -11.904807              | -9.066155  | -10.599524 |
| 28       | H     | -12.194922              | -10.210145 | -12.674005 |
| 29       | C     | -11.411598              | -7.636547  | -12.827056 |
| 30       | C     | -10.913516              | -6.523480  | -12.127255 |
| 31       | C     | -11.089234              | -7.734400  | -14.191517 |

|    |   |            |           |            |
|----|---|------------|-----------|------------|
| 32 | C | -10.129537 | -5.556664 | -12.755403 |
| 33 | H | -11.132747 | -6.415065 | -11.068733 |
| 34 | C | -10.305494 | -6.771749 | -14.827996 |
| 35 | H | -11.445233 | -8.584795 | -14.766215 |
| 36 | C | -9.822505  | -5.677967 | -14.110726 |
| 37 | H | -9.752744  | -4.712140 | -12.187548 |
| 38 | H | -10.065999 | -6.878194 | -15.881082 |
| 39 | H | -9.209119  | -4.930056 | -14.601374 |
| 40 | O | -16.497539 | -8.483041 | -10.304447 |
| 41 | C | -17.710967 | -8.860987 | -11.022954 |
| 42 | C | -16.721465 | -7.257367 | -9.559530  |
| 43 | H | -18.113975 | -9.756918 | -10.542160 |
| 44 | H | -16.223073 | -6.431081 | -10.078157 |
| 45 | C | -18.234590 | -7.067821 | -9.535974  |
| 46 | C | -18.652878 | -7.668097 | -10.886149 |
| 47 | H | -16.276080 | -7.377423 | -8.571117  |
| 48 | H | -18.515433 | -6.019483 | -9.424608  |
| 49 | H | -18.677402 | -7.632327 | -8.710701  |
| 50 | H | -18.476451 | -6.951740 | -11.692849 |
| 51 | H | -19.701715 | -7.966879 | -10.915529 |
| 52 | H | -17.429130 | -9.082668 | -12.049665 |
| 53 | H | -14.745161 | -6.366697 | -12.779386 |
| 54 | O | -15.302345 | -8.319282 | -12.816338 |
| 55 | C | -15.403430 | -7.114410 | -13.273804 |
| 56 | O | -16.146171 | -6.759372 | -14.180467 |

### Cartesian coordinates of INT-3

| Atom No. | Atoms | Coordinates (Angstroms) |           |           |
|----------|-------|-------------------------|-----------|-----------|
|          |       | X                       | Y         | Z         |
| 1        | C     | -2.212744               | 1.578881  | 0.000141  |
| 2        | C     | -0.817584               | 1.578881  | 0.000141  |
| 3        | C     | -0.120046               | 2.786632  | 0.000141  |
| 4        | C     | -0.817700               | 3.995141  | -0.001058 |
| 5        | C     | -2.212525               | 3.995063  | -0.001537 |
| 6        | C     | -2.910126               | 2.786857  | -0.000541 |
| 7        | H     | -2.762503               | 0.626564  | 0.000591  |
| 8        | H     | -0.268076               | 0.626368  | 0.001456  |
| 9        | H     | 0.979634                | 2.786712  | 0.000775  |
| 10       | H     | -0.267500               | 4.947284  | -0.001117 |
| 11       | H     | -4.009730               | 2.787040  | -0.000721 |
| 12       | N     | -2.947848               | 5.267933  | -0.002811 |
| 13       | C     | -1.992881               | 6.385492  | -0.003929 |
| 14       | H     | -0.940847               | 6.190238  | -0.003734 |
| 15       | C     | -2.824607               | 7.705257  | 0.003363  |
| 16       | C     | -2.018168               | 8.843007  | -0.037305 |
| 17       | C     | -2.600388               | 10.108710 | -0.102397 |
| 18       | H     | -0.923393               | 8.741596  | -0.016709 |
| 19       | C     | -4.795841               | 9.099477  | -0.087864 |
| 20       | C     | -3.989666               | 10.237021 | -0.128047 |
| 21       | H     | -1.964818               | 11.005571 | -0.133822 |
| 22       | H     | -5.890787               | 9.200269  | -0.108072 |
| 23       | H     | -4.448498               | 11.235084 | -0.179430 |
| 24       | N     | -4.213300               | 7.833505  | -0.021758 |
| 25       | Co    | -4.546157               | 5.985243  | 0.046646  |
| 26       | Si    | -5.852382               | 5.285513  | -1.751424 |
| 27       | H     | -5.133180               | 4.248545  | -2.505311 |
| 28       | H     | -6.127082               | 6.429935  | -2.632184 |
| 29       | C     | -7.526591               | 4.561094  | -1.091240 |
| 30       | C     | -7.709518               | 3.179755  | -1.021159 |
| 31       | C     | -8.547394               | 5.421168  | -0.686539 |
| 32       | C     | -8.913259               | 2.658696  | -0.547106 |
| 33       | H     | -6.904828               | 2.501958  | -1.341016 |
| 34       | C     | -9.751197               | 4.900109  | -0.211391 |
| 35       | H     | -8.403322               | 6.509904  | -0.741540 |
| 36       | C     | -9.934328               | 3.519113  | -0.141745 |
| 37       | H     | -9.057750               | 1.569922  | -0.492428 |

|    |   |            |          |          |
|----|---|------------|----------|----------|
| 38 | H | -10.555726 | 5.578481 | 0.108013 |
| 39 | H | -10.883326 | 3.108046 | 0.232049 |
| 40 | O | -5.437892  | 5.523676 | 1.564593 |
| 41 | C | -5.075818  | 6.416681 | 2.621165 |
| 42 | H | -4.385747  | 7.212614 | 2.433572 |
| 43 | O | -5.565982  | 6.269660 | 3.770815 |

### Cartesian coordinates of INT-4

| Atom No. | Atoms | Coordinates (Angstroms) |            |            |
|----------|-------|-------------------------|------------|------------|
|          |       | X                       | Y          | Z          |
| 1        | C     | -14.055015              | -8.642455  | -11.153012 |
| 2        | C     | -13.630420              | -7.637684  | -10.242637 |
| 3        | N     | -14.392881              | -8.299809  | -12.406589 |
| 4        | Co    | -14.157673              | -6.333373  | -12.600172 |
| 5        | C     | -13.168238              | -5.359004  | -9.872945  |
| 6        | C     | -13.247246              | -7.922999  | -8.906753  |
| 7        | C     | -12.783171              | -5.584382  | -8.565582  |
| 8        | C     | -12.828752              | -6.910981  | -8.075420  |
| 9        | N     | -13.584725              | -6.329295  | -10.706476 |
| 10       | H     | -13.156091              | -4.357735  | -10.291762 |
| 11       | H     | -12.460745              | -4.760679  | -7.942113  |
| 12       | H     | -12.535905              | -7.127062  | -7.054245  |
| 13       | H     | -13.290887              | -8.948648  | -8.557105  |
| 14       | C     | -14.782042              | -9.220937  | -13.366961 |
| 15       | C     | -15.286025              | -8.703577  | -14.579874 |
| 16       | C     | -14.715715              | -10.626310 | -13.233807 |
| 17       | C     | -15.707438              | -9.537482  | -15.604582 |
| 18       | H     | -15.343188              | -7.625357  | -14.685472 |
| 19       | C     | -15.139460              | -11.455159 | -14.267555 |
| 20       | H     | -14.318174              | -11.072166 | -12.330600 |
| 21       | C     | -15.639115              | -10.926110 | -15.459230 |
| 22       | H     | -16.091733              | -9.103939  | -16.521809 |
| 23       | H     | -15.073775              | -12.531083 | -14.142019 |
| 24       | H     | -15.964268              | -11.581154 | -16.258974 |
| 25       | H     | -14.106968              | -9.667457  | -10.797293 |
| 26       | Si    | -16.001057              | -5.073187  | -13.217049 |
| 27       | O     | -13.153787              | -5.573932  | -13.953023 |
| 28       | C     | -13.731304              | -4.562377  | -14.782559 |
| 29       | H     | -13.127657              | -4.053902  | -15.505030 |
| 30       | O     | -15.032418              | -4.272657  | -14.596973 |
| 31       | C     | -16.522345              | -3.980409  | -11.701234 |
| 32       | C     | -15.917128              | -2.740514  | -11.494248 |
| 33       | C     | -17.502247              | -4.434192  | -10.818386 |
| 34       | C     | -16.291310              | -1.954944  | -10.404252 |
| 35       | H     | -15.144078              | -2.383384  | -12.190016 |
| 36       | C     | -17.877359              | -3.648069  | -9.728564  |
| 37       | H     | -17.979482              | -5.411320  | -10.981474 |
| 38       | C     | -17.271993              | -2.408670  | -9.521297  |
| 39       | H     | -15.813869              | -0.977912  | -10.240684 |
| 40       | H     | -18.650290              | -4.005934  | -9.032875  |
| 41       | H     | -17.566899              | -1.789076  | -8.661977  |
| 42       | H     | -16.663115              | -6.373519  | -13.038959 |
| 43       | H     | -17.133424              | -4.538935  | -13.987256 |

|    |    |            |            |            |
|----|----|------------|------------|------------|
| 9  | N  | -13.944120 | -6.705986  | -10.573162 |
| 10 | H  | -13.508987 | -4.751572  | -10.067839 |
| 11 | H  | -13.042974 | -5.213862  | -7.686554  |
| 12 | H  | -13.269826 | -7.585243  | -6.844811  |
| 13 | H  | -13.930732 | -9.363054  | -8.447679  |
| 14 | C  | -14.969481 | -9.481353  | -13.369130 |
| 15 | C  | -14.697225 | -9.170618  | -14.715797 |
| 16 | C  | -15.660645 | -10.679757 | -13.098969 |
| 17 | C  | -15.079715 | -10.024337 | -15.742419 |
| 18 | H  | -14.160963 | -8.256791  | -14.946656 |
| 19 | C  | -16.040666 | -11.529998 | -14.133416 |
| 20 | H  | -15.928477 | -10.933863 | -12.081014 |
| 21 | C  | -15.752351 | -11.215316 | -15.460971 |
| 22 | H  | -14.848264 | -9.760525  | -16.768746 |
| 23 | H  | -16.576770 | -12.443302 | -13.897914 |
| 24 | H  | -16.051795 | -11.881003 | -16.261984 |
| 25 | H  | -14.520746 | -10.012914 | -10.810380 |
| 26 | Si | -15.103459 | -4.517148  | -12.818040 |
| 27 | O  | -12.533113 | -5.654006  | -13.130101 |
| 28 | C  | -12.468686 | -4.427367  | -12.983046 |
| 29 | O  | -13.489882 | -3.676980  | -12.710265 |
| 30 | C  | -16.119300 | -3.700767  | -11.475245 |
| 31 | C  | -15.970861 | -2.335715  | -11.174698 |
| 32 | C  | -17.074338 | -4.438808  | -10.757784 |
| 33 | C  | -16.751541 | -1.730884  | -10.192547 |
| 34 | H  | -15.236655 | -1.740285  | -11.706935 |
| 35 | C  | -17.861729 | -3.833560  | -9.779841  |
| 36 | H  | -17.199959 | -5.497637  | -10.957801 |
| 37 | C  | -17.700984 | -2.478663  | -9.495794  |
| 38 | H  | -16.621394 | -0.677179  | -9.971870  |
| 39 | H  | -18.594909 | -4.419942  | -9.237364  |
| 40 | H  | -18.310409 | -2.007209  | -8.732862  |
| 41 | H  | -15.734808 | -6.119531  | -13.056209 |
| 42 | H  | -15.475810 | -3.978998  | -14.154207 |
| 43 | H  | -11.515549 | -3.901353  | -13.054837 |
| 44 | N  | -12.208727 | -3.599717  | -15.771203 |
| 45 | H  | -13.110776 | -3.314620  | -16.126737 |
| 46 | H  | -11.911739 | -4.476316  | -16.177337 |
| 47 | C  | -11.236232 | -2.596023  | -15.755845 |
| 48 | C  | -11.602883 | -1.241459  | -15.701088 |
| 49 | C  | -9.870717  | -2.923401  | -15.722061 |
| 50 | C  | -10.630440 | -0.249711  | -15.619224 |
| 51 | H  | -12.653980 | -0.972271  | -15.723665 |
| 52 | C  | -8.906554  | -1.922966  | -15.640671 |
| 53 | H  | -9.570931  | -3.965783  | -15.762901 |
| 54 | C  | -9.275032  | -0.578760  | -15.587989 |
| 55 | H  | -10.937247 | 0.790043   | -15.581682 |
| 56 | H  | -7.857861  | -2.199374  | -15.620065 |
| 57 | H  | -8.521228  | 0.197028   | -15.525870 |

### Cartesian coordinates of INT-5

| Atom No. | Atoms | Coordinates (Angstroms) |           |            |
|----------|-------|-------------------------|-----------|------------|
|          |       | X                       | Y         | Z          |
| 1        | C     | -14.416988              | -8.973322 | -11.103827 |
| 2        | C     | -14.065280              | -8.011660 | -10.129945 |
| 3        | N     | -14.553055              | -8.579681 | -12.381919 |
| 4        | Co    | -14.315394              | -6.604463 | -12.590201 |
| 5        | C     | -13.584911              | -5.762345 | -9.682541  |
| 6        | C     | -13.824580              | -8.333448 | -8.769900  |
| 7        | C     | -13.327511              | -6.019986 | -8.350009  |
| 8        | C     | -13.457613              | -7.347540 | -7.885586  |

**9. XPS analysis.** All the binding energies were corrected with reference to the C1s peak at 284.8 eV. MULTIPAK software was used for peak analysis and de-convolution studies.

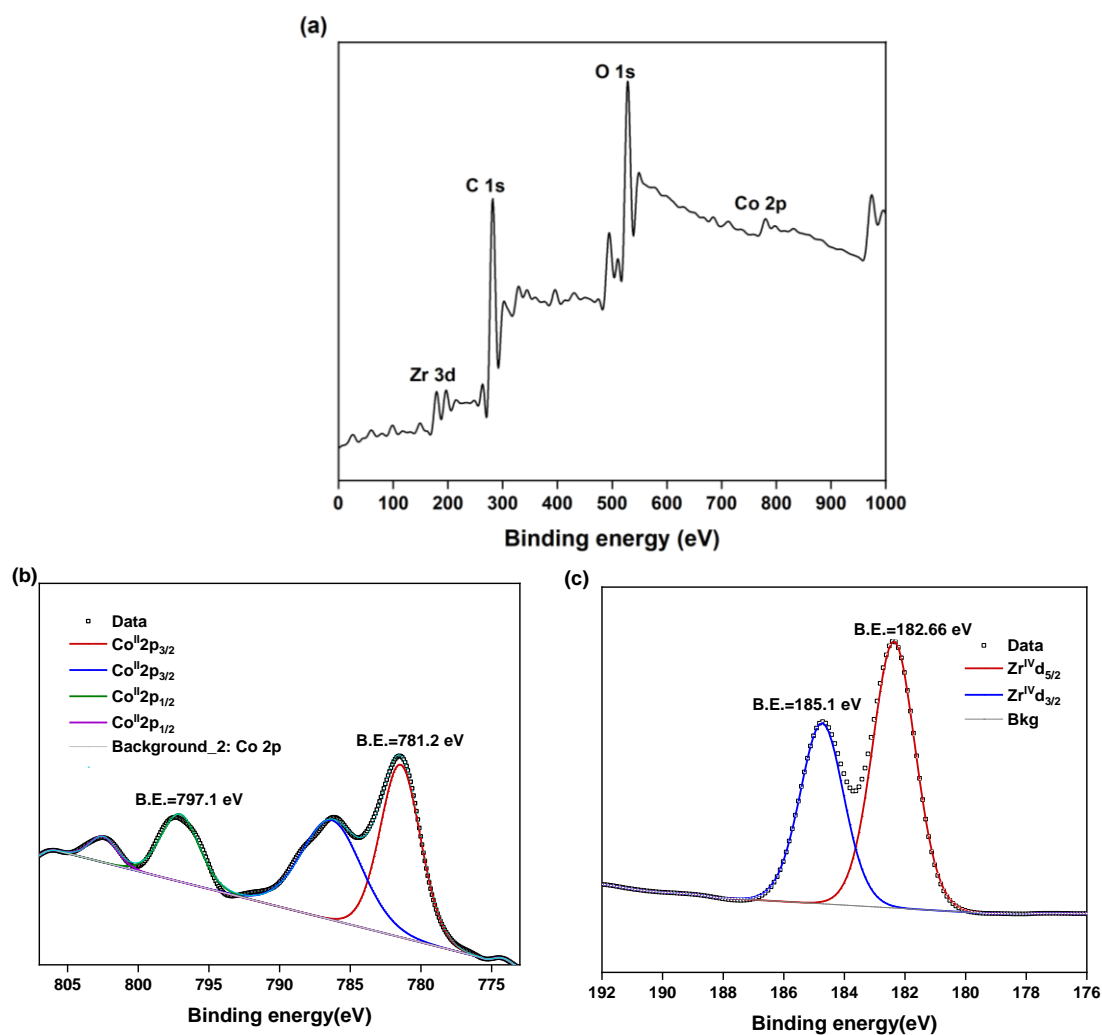

**Figure S15.** (a) XPS data of pyrim-Uio-CoCl<sub>2</sub>. (b) Co 2p XPS spectrum of pyrim-Uio-CoCl<sub>2</sub>. (c) Zr 3d XPS spectrum of pyrim-Uio-CoCl<sub>2</sub>.

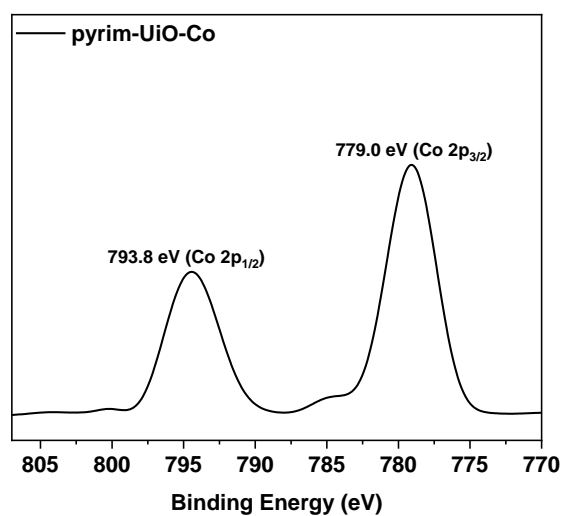

**Figure S16.** Co 2p XPS spectrum of pyrim-Uio-Co(THF).

**Table S9. Comparison of catalytic activity of pyrim-UiO-Co(THF) with that of other reported heterogeneous catalysts in N-formylation of amines with CO<sub>2</sub>.**

| Sl no. | Reference                                          | Catalyst                                                                                                | Conditions                                                                                                                     | Productivity | %Yield of N-Formaldehyde |
|--------|----------------------------------------------------|---------------------------------------------------------------------------------------------------------|--------------------------------------------------------------------------------------------------------------------------------|--------------|--------------------------|
| 1      | New J. Chem., 2021,45, 9501-9505                   | Zn(OAc) <sub>2</sub> on mesoporous organosilica                                                         | 1 mmol amine, CO <sub>2</sub> (5 bar), PhSiH <sub>3</sub> (1 mmol), 1 mol% Catalyst, 60° C, 17 h, CH <sub>3</sub> CN           |              | 33-86%                   |
| 2      | ACS Sustainable Chem. Eng., 2020, 8, 14, 5576–5583 | Ru-PPh <sub>3</sub> -SO <sub>3</sub> Na@POPs                                                            | 1 mmol amine, CO <sub>2</sub> (30 bar), H <sub>2</sub> (30 bar), 0.4 mol% Catalyst, 100° C, 48 h, DMI                          | TON 250      | 30-80%                   |
| 3      | Chem. Cat. Chem., 2018, 10, 22, 5124-5127          | Mg-Al layered double hydroxide supported Pd catalyst                                                    | 1 mmol amine, CO <sub>2</sub> (30 bar), H <sub>2</sub> (30 bar), 1 mol% Catalyst, 140° C, 16 h, CH <sub>3</sub> OH             |              | 88-97%                   |
| 4      | Sci. China Chem., 2018, 61, 725–731                | Pd/N-doped carbon nanocatalysts                                                                         | 1 mmol amine, CO <sub>2</sub> (30 bar), H <sub>2</sub> (40 bar), 20 mg (2 mol%) Catalyst, 130° C, 24 h, ethanol                | TON 247      | 11-99%                   |
| 5      | Chem. Asian J., 2018, 13, 20, 3018-3021            | NHC-Ir coordination assembly                                                                            | 10 mmol amine, CO <sub>2</sub> (30 bar), H <sub>2</sub> (30 bar), 0.1 mol% Catalyst, 100° C, 20 h, CH <sub>3</sub> OH          | TON 990      | 53-97%                   |
| 6      | Inorganica Chim. Acta., 2020, 501, 119274          | UiO-66 MOF                                                                                              | 5 mmol amine, CO <sub>2</sub> (10 bar), DMAB (1.5 eq.), 10 mg (0.3 mol%) Catalyst, 60° C, 12 h, DMF                            |              | 30-94%                   |
| 7      | New J. Chem., 2017, 41, 2869-2872                  | CarPy-CMP@Ru (Pyridine-functionalized organic porous polymers)                                          | 1 mmol amine, CO <sub>2</sub> (40 bar), H <sub>2</sub> (40 bar), 0.5 mol% Catalyst, 130° C, 24 h, CH <sub>3</sub> OH           | TON 188      | 89-91%                   |
| 8      | Chem. Cat. Chem., 2017, 9, 11, 1939-1946           | Pd NPs@Hypercrosslinked Microporous Polymer                                                             | 1 mmol amine, CO <sub>2</sub> (10 bar), Diphenylmethylsilane (2.5 mmol), 50 mg (0.5 mol%) Catalyst, 60° C, 20 h, dioxane+water |              | 79-97%                   |
| 9      | Catal. Lett., 2018, 148, 2487–2500                 | FeNi <sub>3</sub> /KCC1/APTPOSS/TCT/PVA/Cu(II) MNPs (Copper(II) Complex-Based FeNi <sub>3</sub> /KCC-1) | 10 mmol amine, CO <sub>2</sub> (15 bar), H <sub>2</sub> (20 bar), 18 mg Catalyst, 90° C, 1.5 h, dioxane                        |              | 58-96%                   |

|    |                                                       |                                                                                     |                                                                                                                                   |                       |               |
|----|-------------------------------------------------------|-------------------------------------------------------------------------------------|-----------------------------------------------------------------------------------------------------------------------------------|-----------------------|---------------|
| 10 | ACS Sustainable Chem., Eng. 2017, 5, 3, 2516–2528     | Pd–Au@Polyaniline-Functionalized CNs                                                | 1 mmol amine, CO <sub>2</sub> (35 bar), H <sub>2</sub> (35 bar), 50 mg (Pd 1.6 wt %, Au 3.0 wt %) Catalyst, 125° C, 48 h, dioxane |                       | 0.1-95%       |
| 11 | Chem. Cat. Chem., 2017, 9, 19, 3632-3636              | Au NPs@TiO <sub>2</sub>                                                             | 0.5 mmol amine, CO <sub>2</sub> (20 bar), H <sub>2</sub> (30 bar), 4.5 mol% Catalyst, 100-140° C, 5-20 h, DMA                     |                       | 91-99%        |
| 12 | Chin. J. Catal., 2019, 40, 8, 1141-1146               | Pd/PAL catalyst (PAL-Palygorskite)                                                  | 1 mmol amine, CO <sub>2</sub> (10 bar), H <sub>2</sub> (30 bar), 0.35 mol% Catalyst, 96° C, CH <sub>3</sub> OH                    | TON 283               | 76-99%        |
| 13 | ACS Sustainable Chem., Eng., 2021, 9, 48, 16153-16162 | Pd <sub>0.25</sub> Cu <sub>0.75</sub> /Al <sub>2</sub> O <sub>3-0.1</sub>           | 1 mmol amine, CO <sub>2</sub> (20 bar), H <sub>2</sub> (40 bar), 60 mg Catalyst, 150° C, 3 h, THF                                 | TON 527               | 8-99%         |
| 14 | Appl. Catal. B., 2021, 294, 5, 120238                 | Zn-TpPa (Zn single atom catalyst@COF)                                               | CO <sub>2</sub> (10 bar), phenylsilane(2 eq.), 30° C, 18 h, DMF                                                                   | TON 51467             | 79-99%        |
| 15 | ACS Sustainable Chem., Eng., 2017, 5, 7, 5758–5765    | Nano-Pd/C in situ reduction of Pd(NH <sub>3</sub> ) <sub>x</sub> Cl <sub>y</sub> /C | 1mmol amine, 10/30 bar CO <sub>2</sub> /H <sub>2</sub> , 50mg Pd/C, 0.5 mmol KOH, 5 h, CH <sub>3</sub> OH                         |                       | 27-51%        |
| 16 | Chem. Eur. J., 2018, 24, 16588                        | Porous organic polymers with inbuilt NHCs                                           | 0.5 mmol amine, 0.75 mmol phenylsilane, CO <sub>2</sub> (4 bar), 25° C, 24 h, THF                                                 |                       | 22-98%        |
| 17 | Adv. Synth. Catal. 2021, 363, 1335                    | Ru/POP <sub>3</sub> -Py&PPh <sub>3</sub>                                            | 1 mmol amine, 16.5 mg of catalyst, CO <sub>2</sub> (20 bar), H <sub>2</sub> (20 bar), 100° C, 24 h                                |                       | 67-99%        |
| 18 | Asian J. Org. Chem. 2022, 11, e202200064              | PdNPore                                                                             | 1 mmol amine, 2.7 mg of catalyst, 2 mmol phenylsilane, CO <sub>2</sub> (10 bar), 36 h, MeCN/H <sub>2</sub> O                      |                       | 32-86%        |
| 19 | <b>This work</b>                                      | <b>Pyrim-UiO-Co(THF)<sub>2</sub> MOF</b>                                            | <b>0.375 mmol amine, CO<sub>2</sub> (1 bar), phenylsilane (0.750 mmol), 80° C, 16 h, THF</b>                                      | <b>TON up to 6000</b> | <b>41-99%</b> |

## 10. References

1. J. H. Cavka, S. Jakobsen, U. Olsbye, N. Guillou, C. Lamberti, S. Bordiga and K. P. Lillerud, *J. Am. Chem. Soc.*, 2008, **130**, 13850-13851.
2. T. Zhang, K. Manna and W. Lin, *J. Am. Chem. Soc.*, 2016, **138**, 3241-3249.
3. C.-C. Cao, C.-X. Chen, Z.-W. Wei, Q.-F. Qiu, N.-X. Zhu, Y.-Y. Xiong, J.-J. Jiang, D. Wang and C.-Y. Su, *J. Am. Chem. Soc.*, 2019, **141**, 2589-2593.
4. R. Newar, N. Akhtar, N. Antil, A. Kumar, S. Shukla, W. Begum and K. Manna, *Angew. Chem. Int. Ed.*, 2021, **60**, 10964-10970.
5. R. Newar, W. Begum, N. Antil, S. Shukla, A. Kumar, N. Akhtar, Balendra and K. Manna, *Inorg. Chem.*, 2020, **59**, 10473-10481.
6. J. Casado, M. A. Lopez-Quintela and F. M. Lorenzo-Barral, *J. Chem. Educ.*, 1986, **63**, 450.
7. A. K. Poswal, A. Agrawal, A. K. Yadav, C. Nayak, S. Basu, S. R. Kane, C. K. Garg, D. Bhattachryya, S. N. Jha and N. K. Sahoo, *AIP Conf. Proc.*, 2014, **1591**, 649-651.
8. B. Ravel and M. Newville, *J Synchrotron Radiat*, 2005, **12**, 537-541.
9. H. Park, E. N. Brothers and K. M. Merz, *J. Am. Chem. Soc.*, 2005, **127**, 4232-4241.
10. T. Vreven, K. S. Byun, I. Komáromi, S. Dapprich, J. A. Montgomery, Jr., K. Morokuma and M. J. Frisch, *J. Chem. Theory Comput.*, 2006, **2**, 815-826.
11. M. Araújo, B. Lasorne, A. L. Magalhães, G. A. Worth, M. J. Bearpark and M. A. Robb, *J. Chem. Phys.*, 2009, **131**, 144301.
12. V. Yempally, S. J. Kyran, R. K. Raju, W. Y. Fan, E. N. Brothers, D. J. Darensbourg and A. A. Bengali, *Inorg. Chem.*, 2014, **53**, 4081-4088.
13. S. Canneaux, F. Bohr and E. Henon, *J. Comput. Chem.*, 2014, **35**, 82-93.
14. M. Friedrichs, R. Zhou, S. R. Edinger and R. A. Friesner, *J. Phys. Chem. B*, 1999, **103**, 3057-3061.
15. B. Marten, K. Kim, C. Cortis, R. A. Friesner, R. B. Murphy, M. N. Ringnalda, D. Sitkoff and B. Honig, *J. Phys. Chem.*, 1996, **100**, 11775-11788.
